# Supplementary material
Source: PubMed Central journal article supplement (PMC3580859)
Supplement: NIHMS438021-supplement-01.pdf [file NIHMS438021-supplement-01.pdf]

# Supporting Information

## Efficient Synthesis of ESI-09, A Novel Non-cyclic Nucleotide EPAC

### Antagonist

Haijun Chen,<sup>†</sup> Chunyong Ding,<sup>†</sup> Christopher Wild,<sup>†</sup> Huiling Liu,<sup>†</sup> Tianzhi Wang,<sup>‡</sup> Mark A. White,<sup>‡</sup> Xiaodong Cheng,<sup>†,‡</sup> Jia Zhou<sup>†,\*</sup>

<sup>†</sup>Department of Pharmacology and Toxicology, <sup>‡</sup>Sealy Center for Structural Biology and Molecular Biophysics, University of Texas Medical Branch, Galveston, Texas 77555, United States,

Tel: (409) 772-9748; Fax: (409) 772-9818; E-mail: jizhou@utmb.edu.

### Table of Contents

Copies of <sup>1</sup>H and <sup>13</sup>C NMR spectra S2-S13

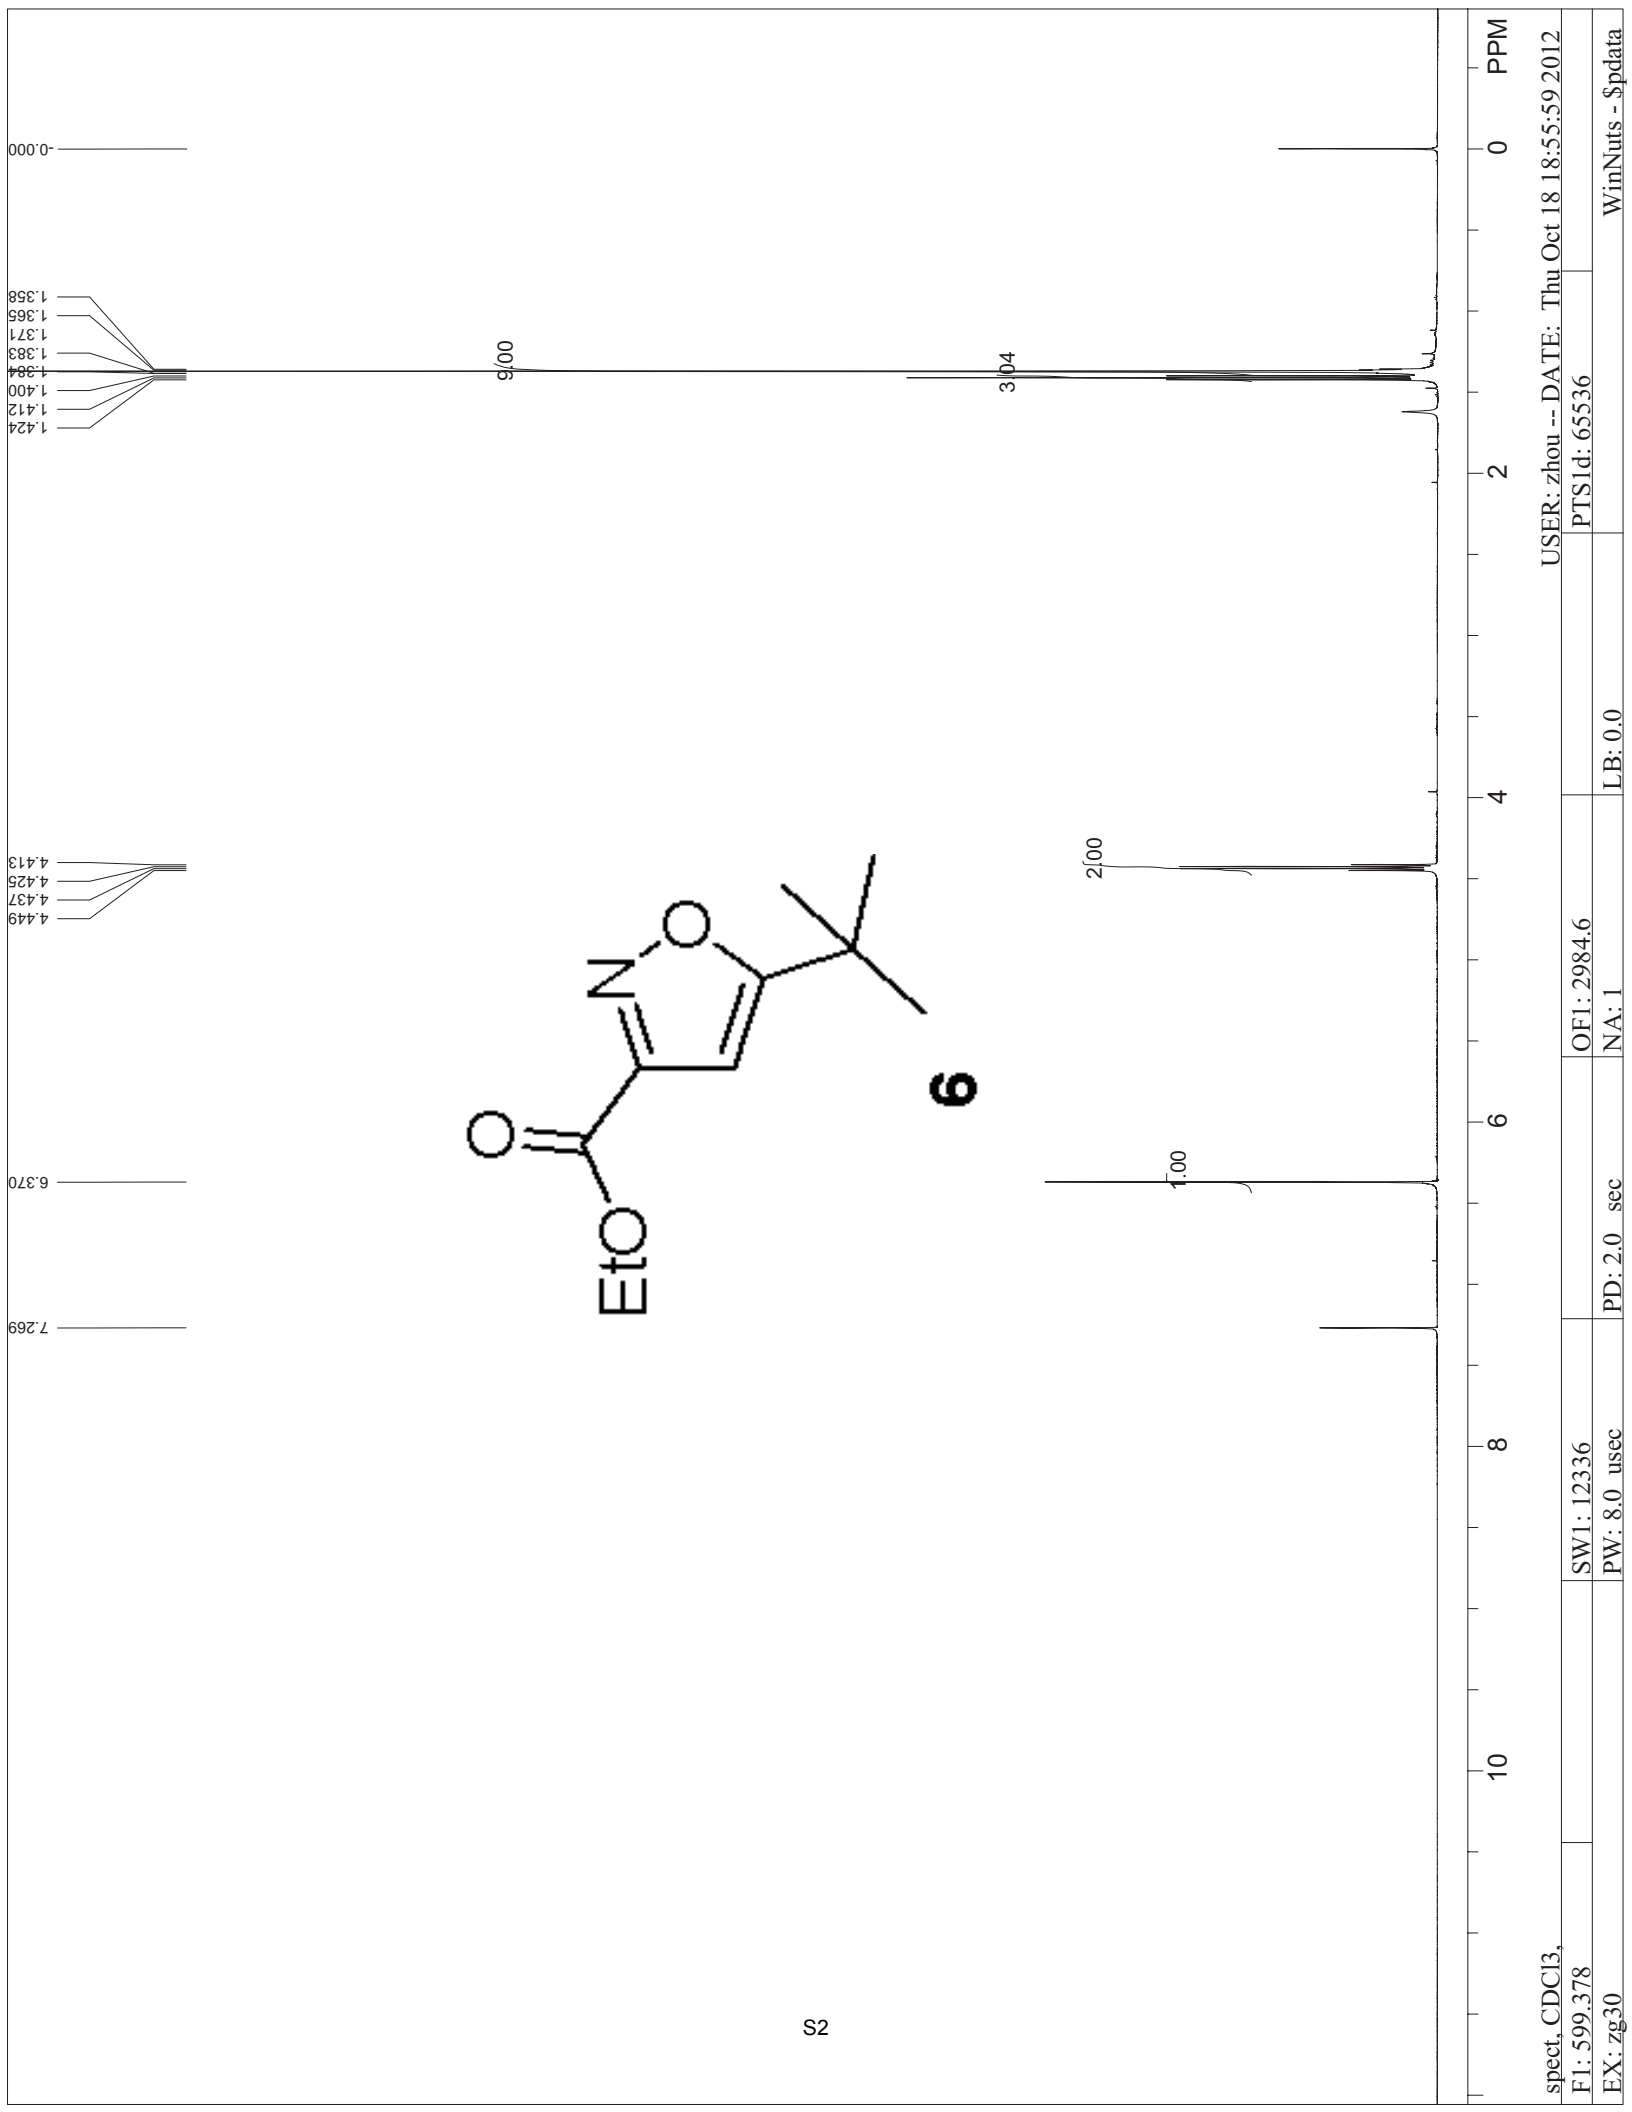

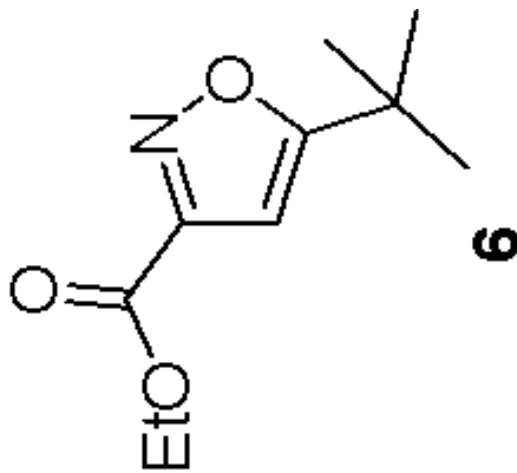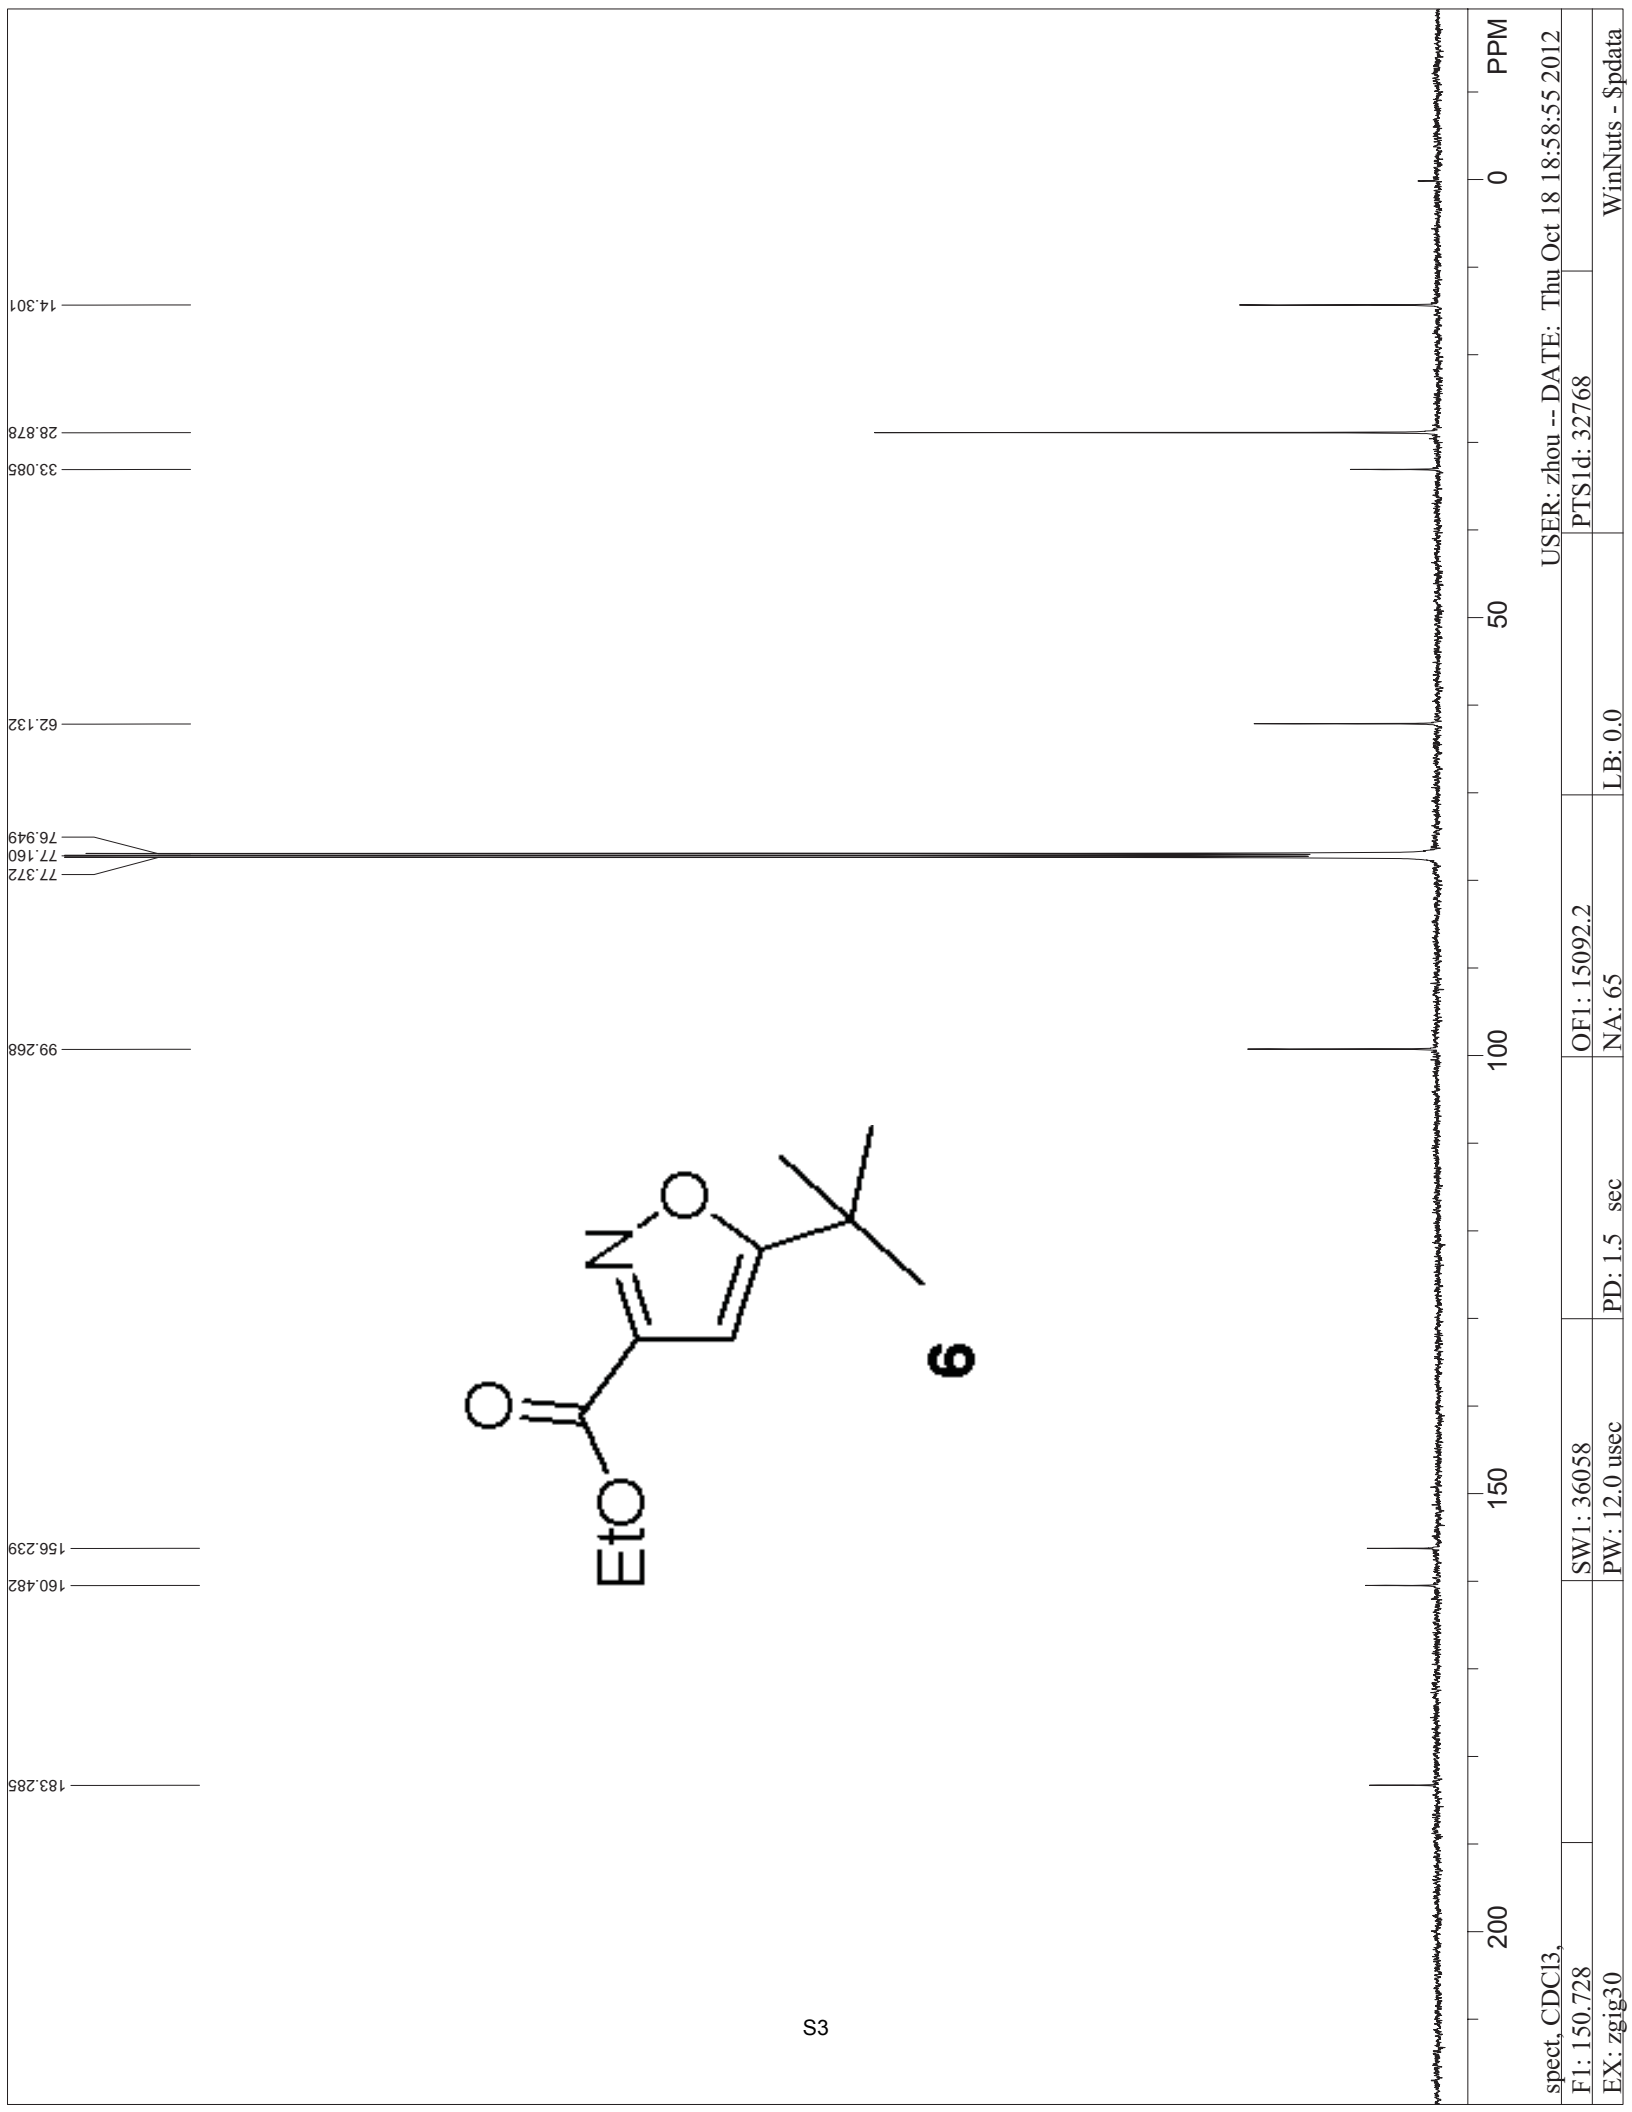

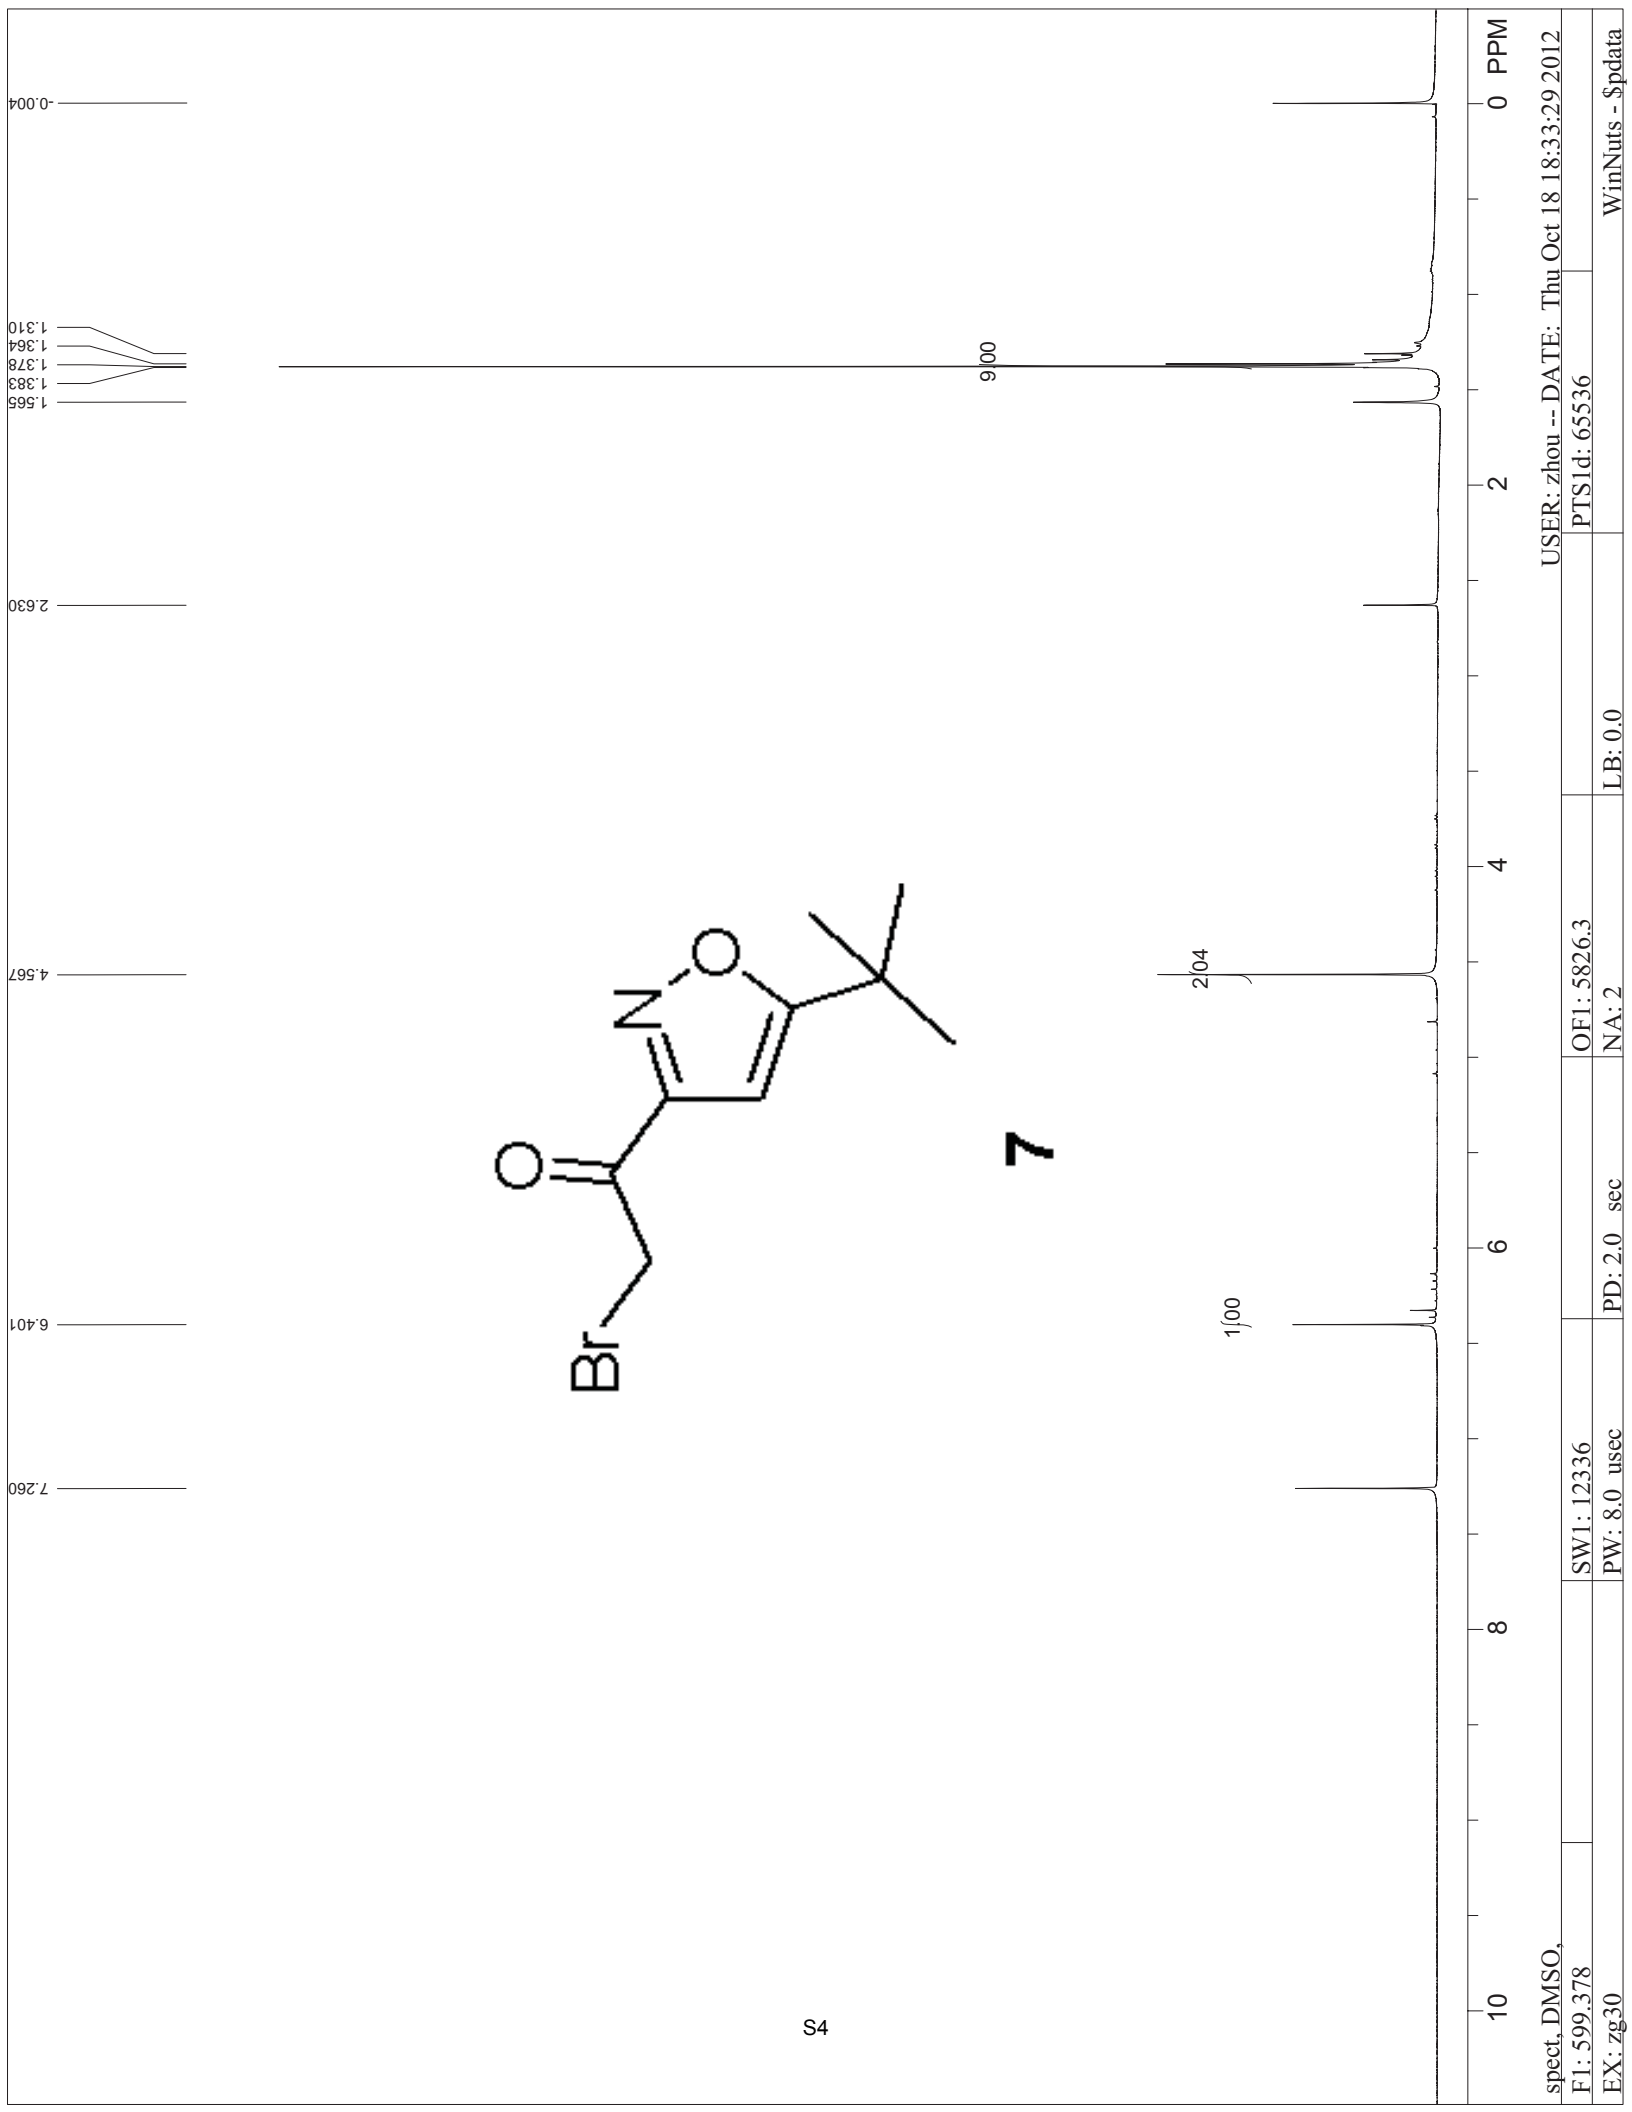

spect, DMSO,

F1: 599.378

EX: zg30

SW1: 12336

PW: 8.0 usec

PD: 2.0 sec

OF1: 5826.3

NA: 2

LB: 0.0

PTS1d: 65536

USER: zhou -- DATE: Thu Oct 18 18:33:29 2012

WinNuts - \$pdata

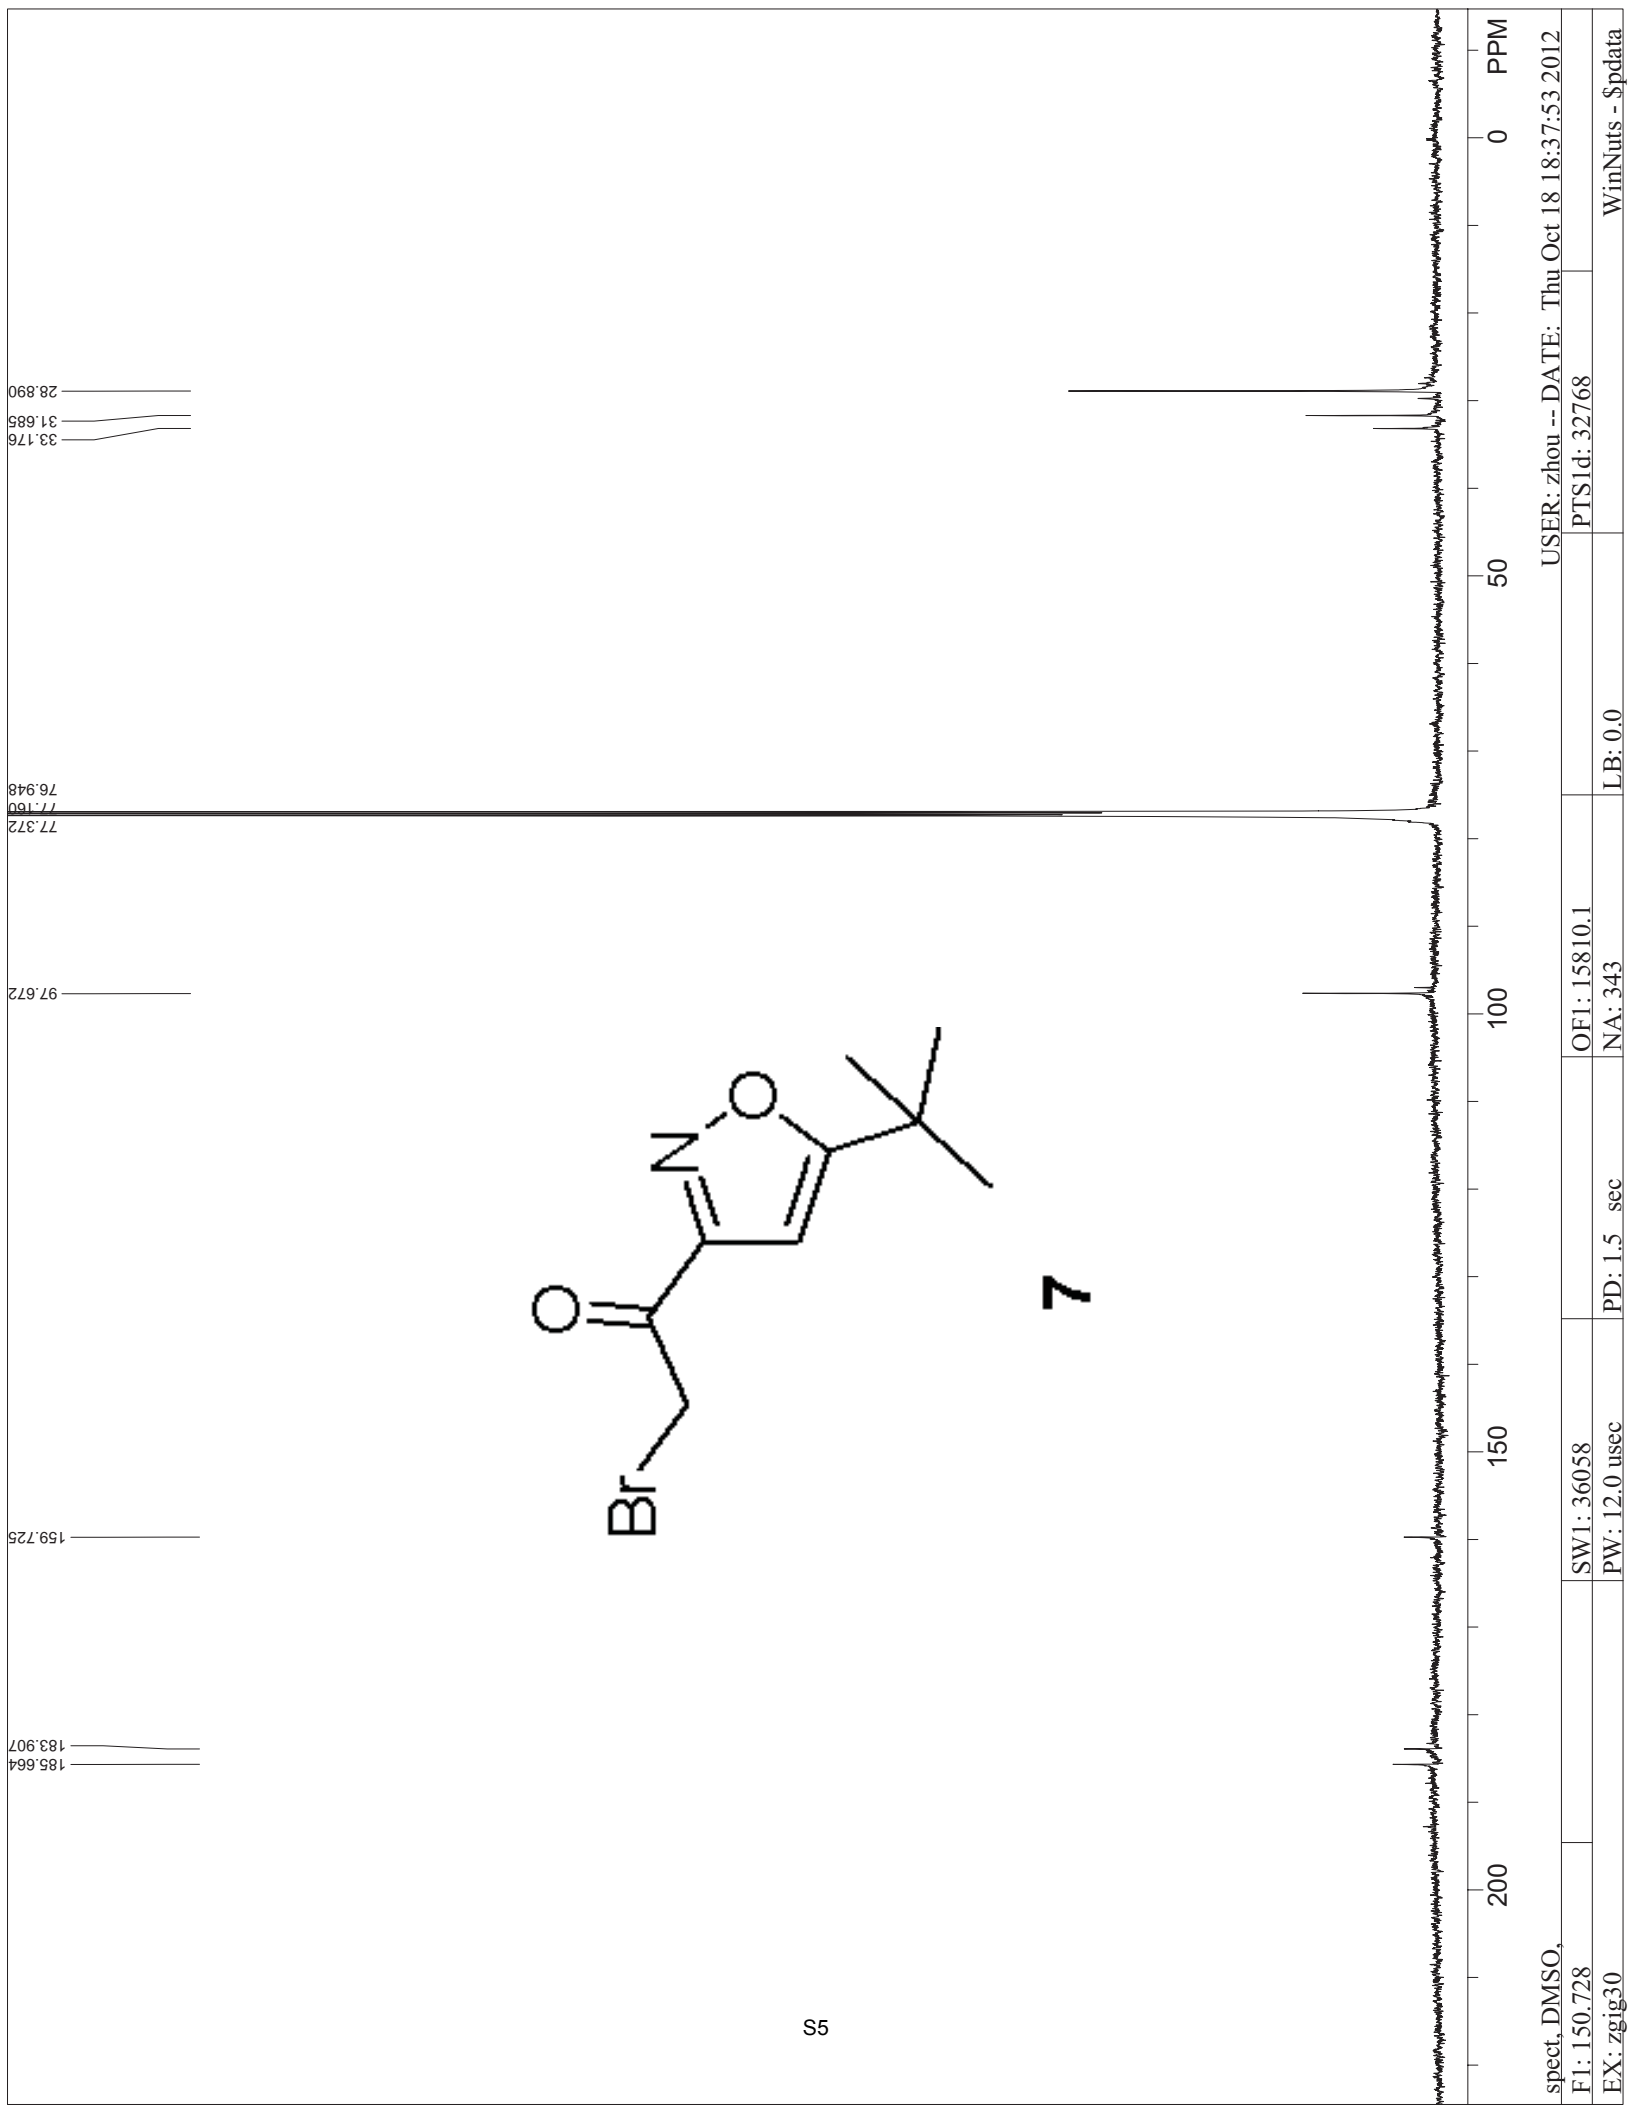

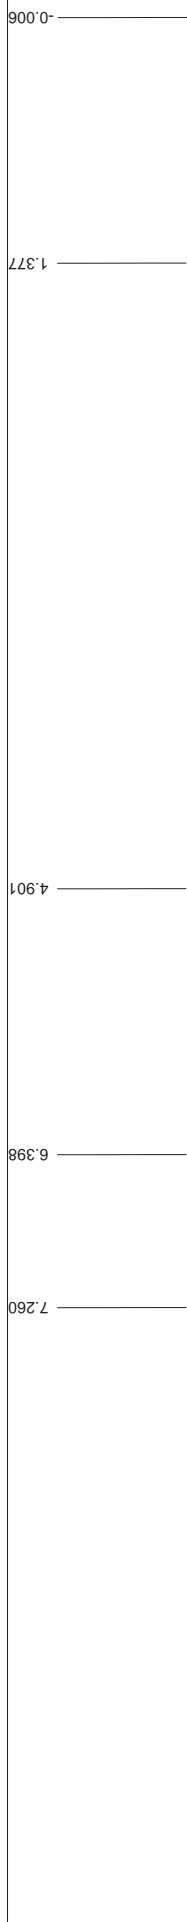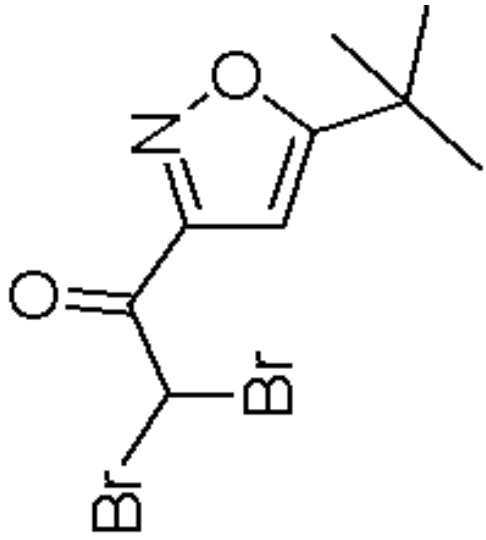

**11**

1.04

1.00

9/19

10 8 6 4 2 0 PPM

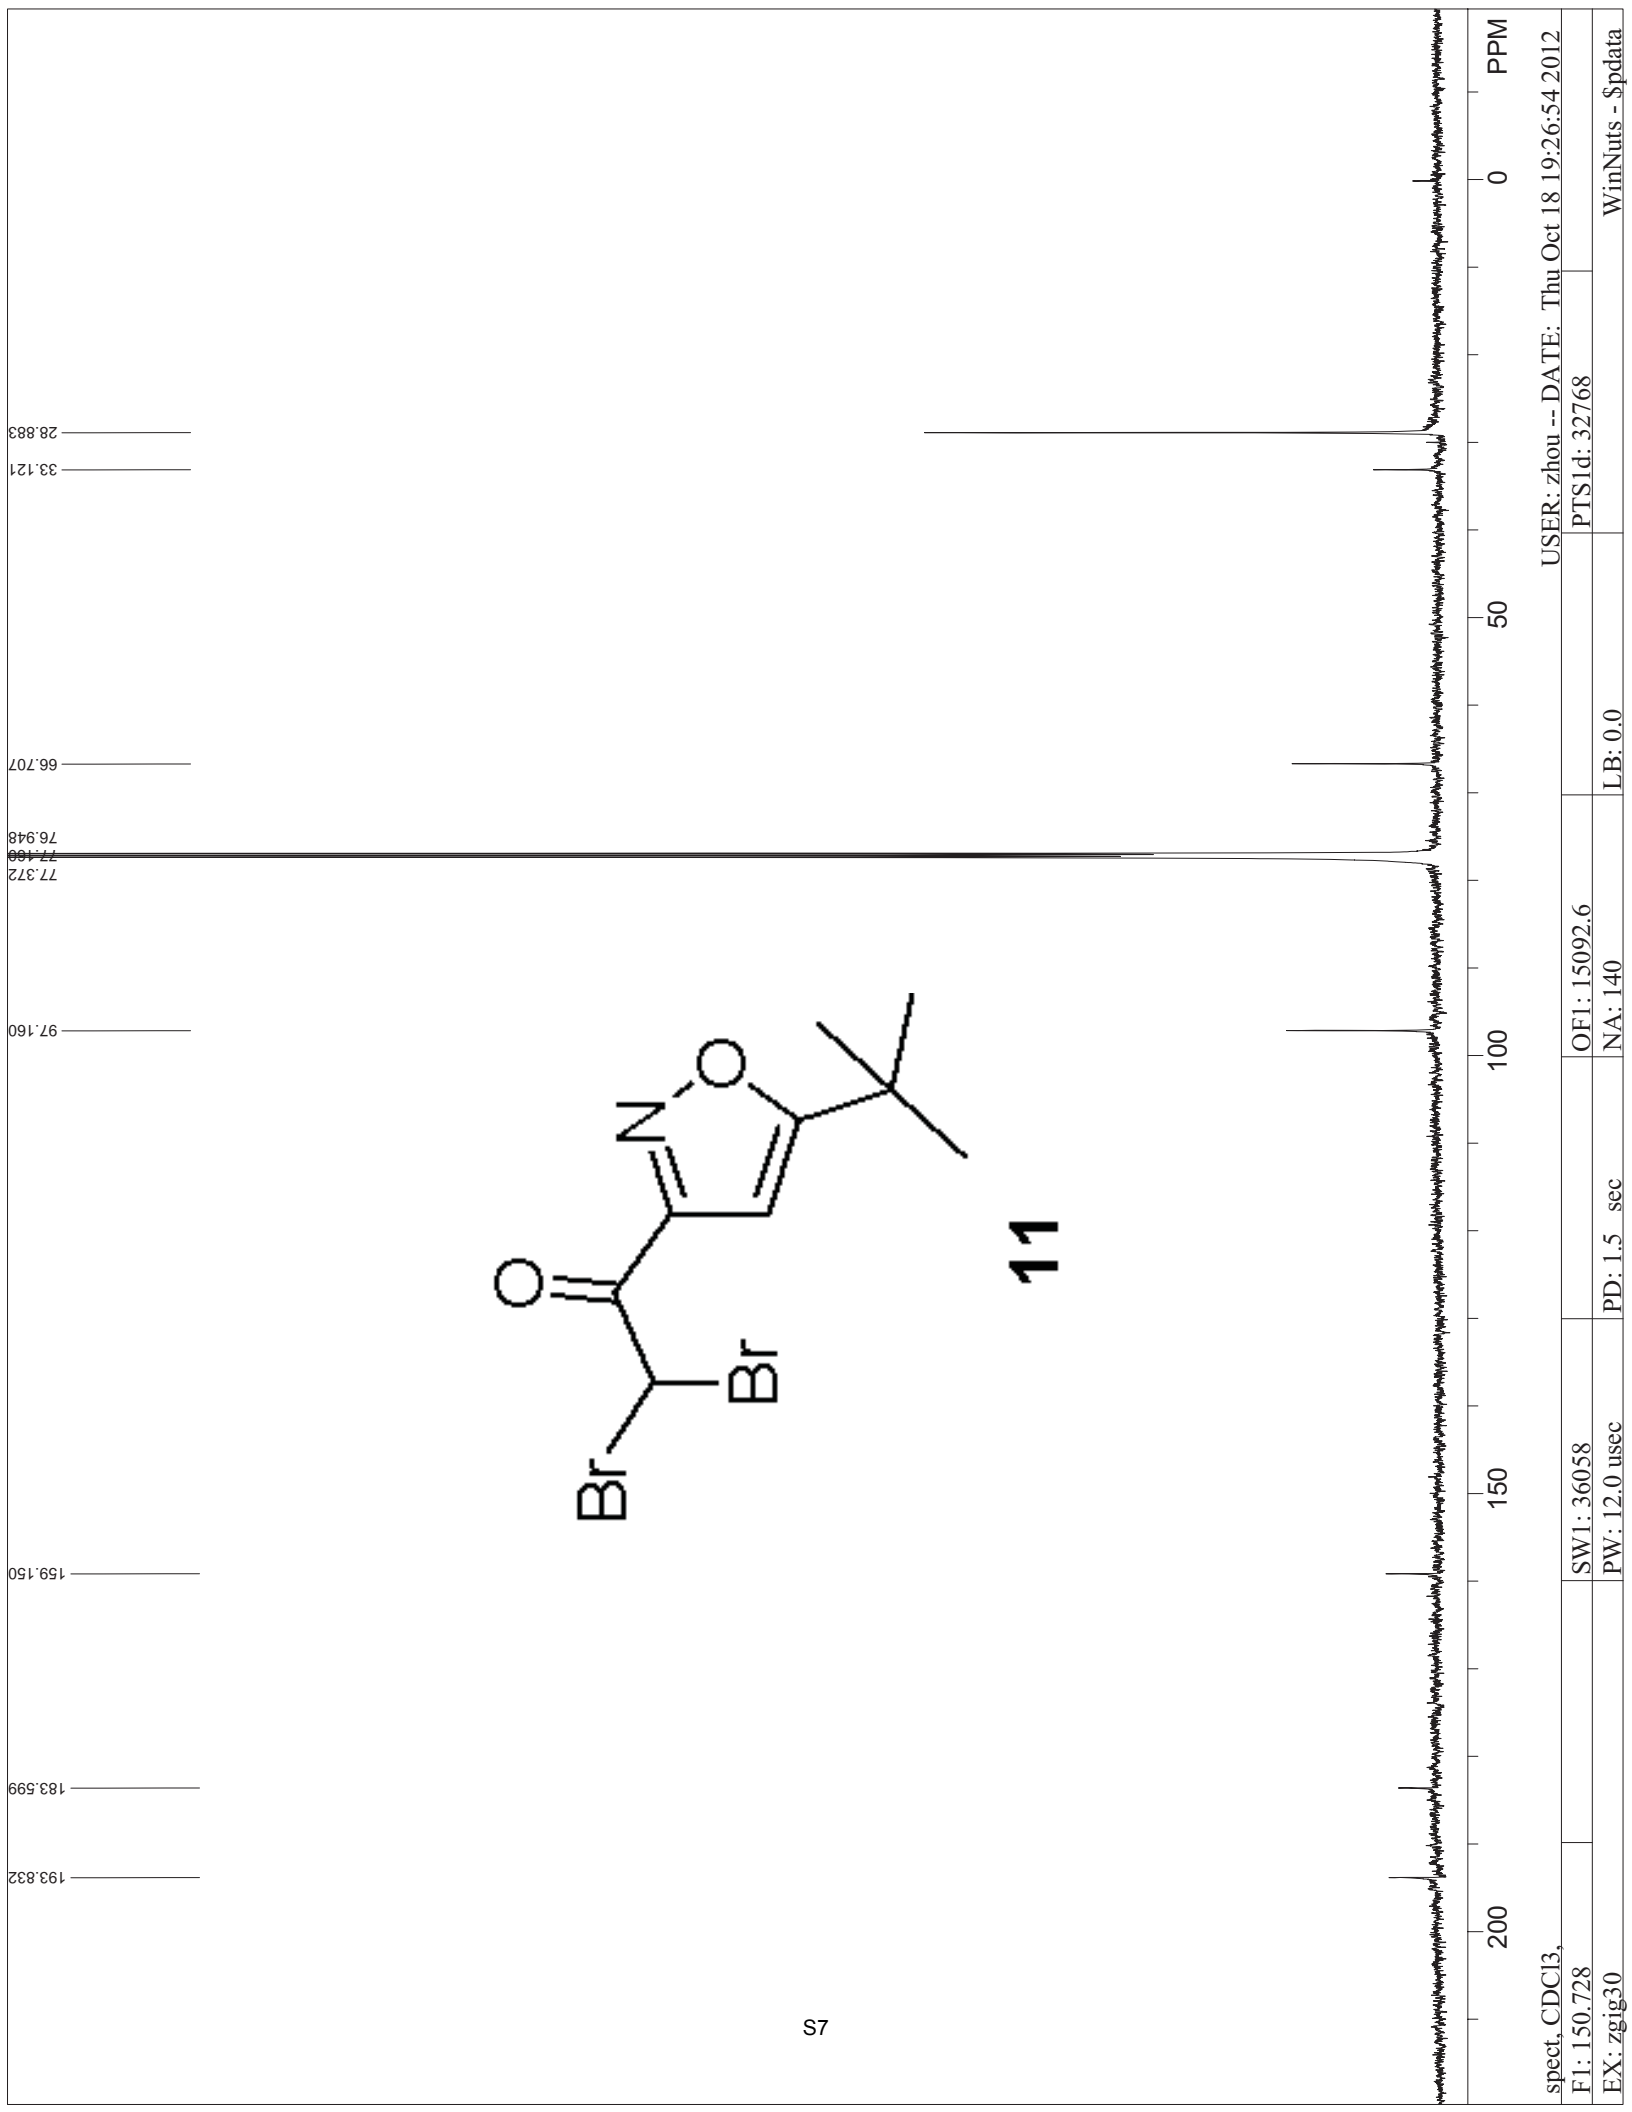

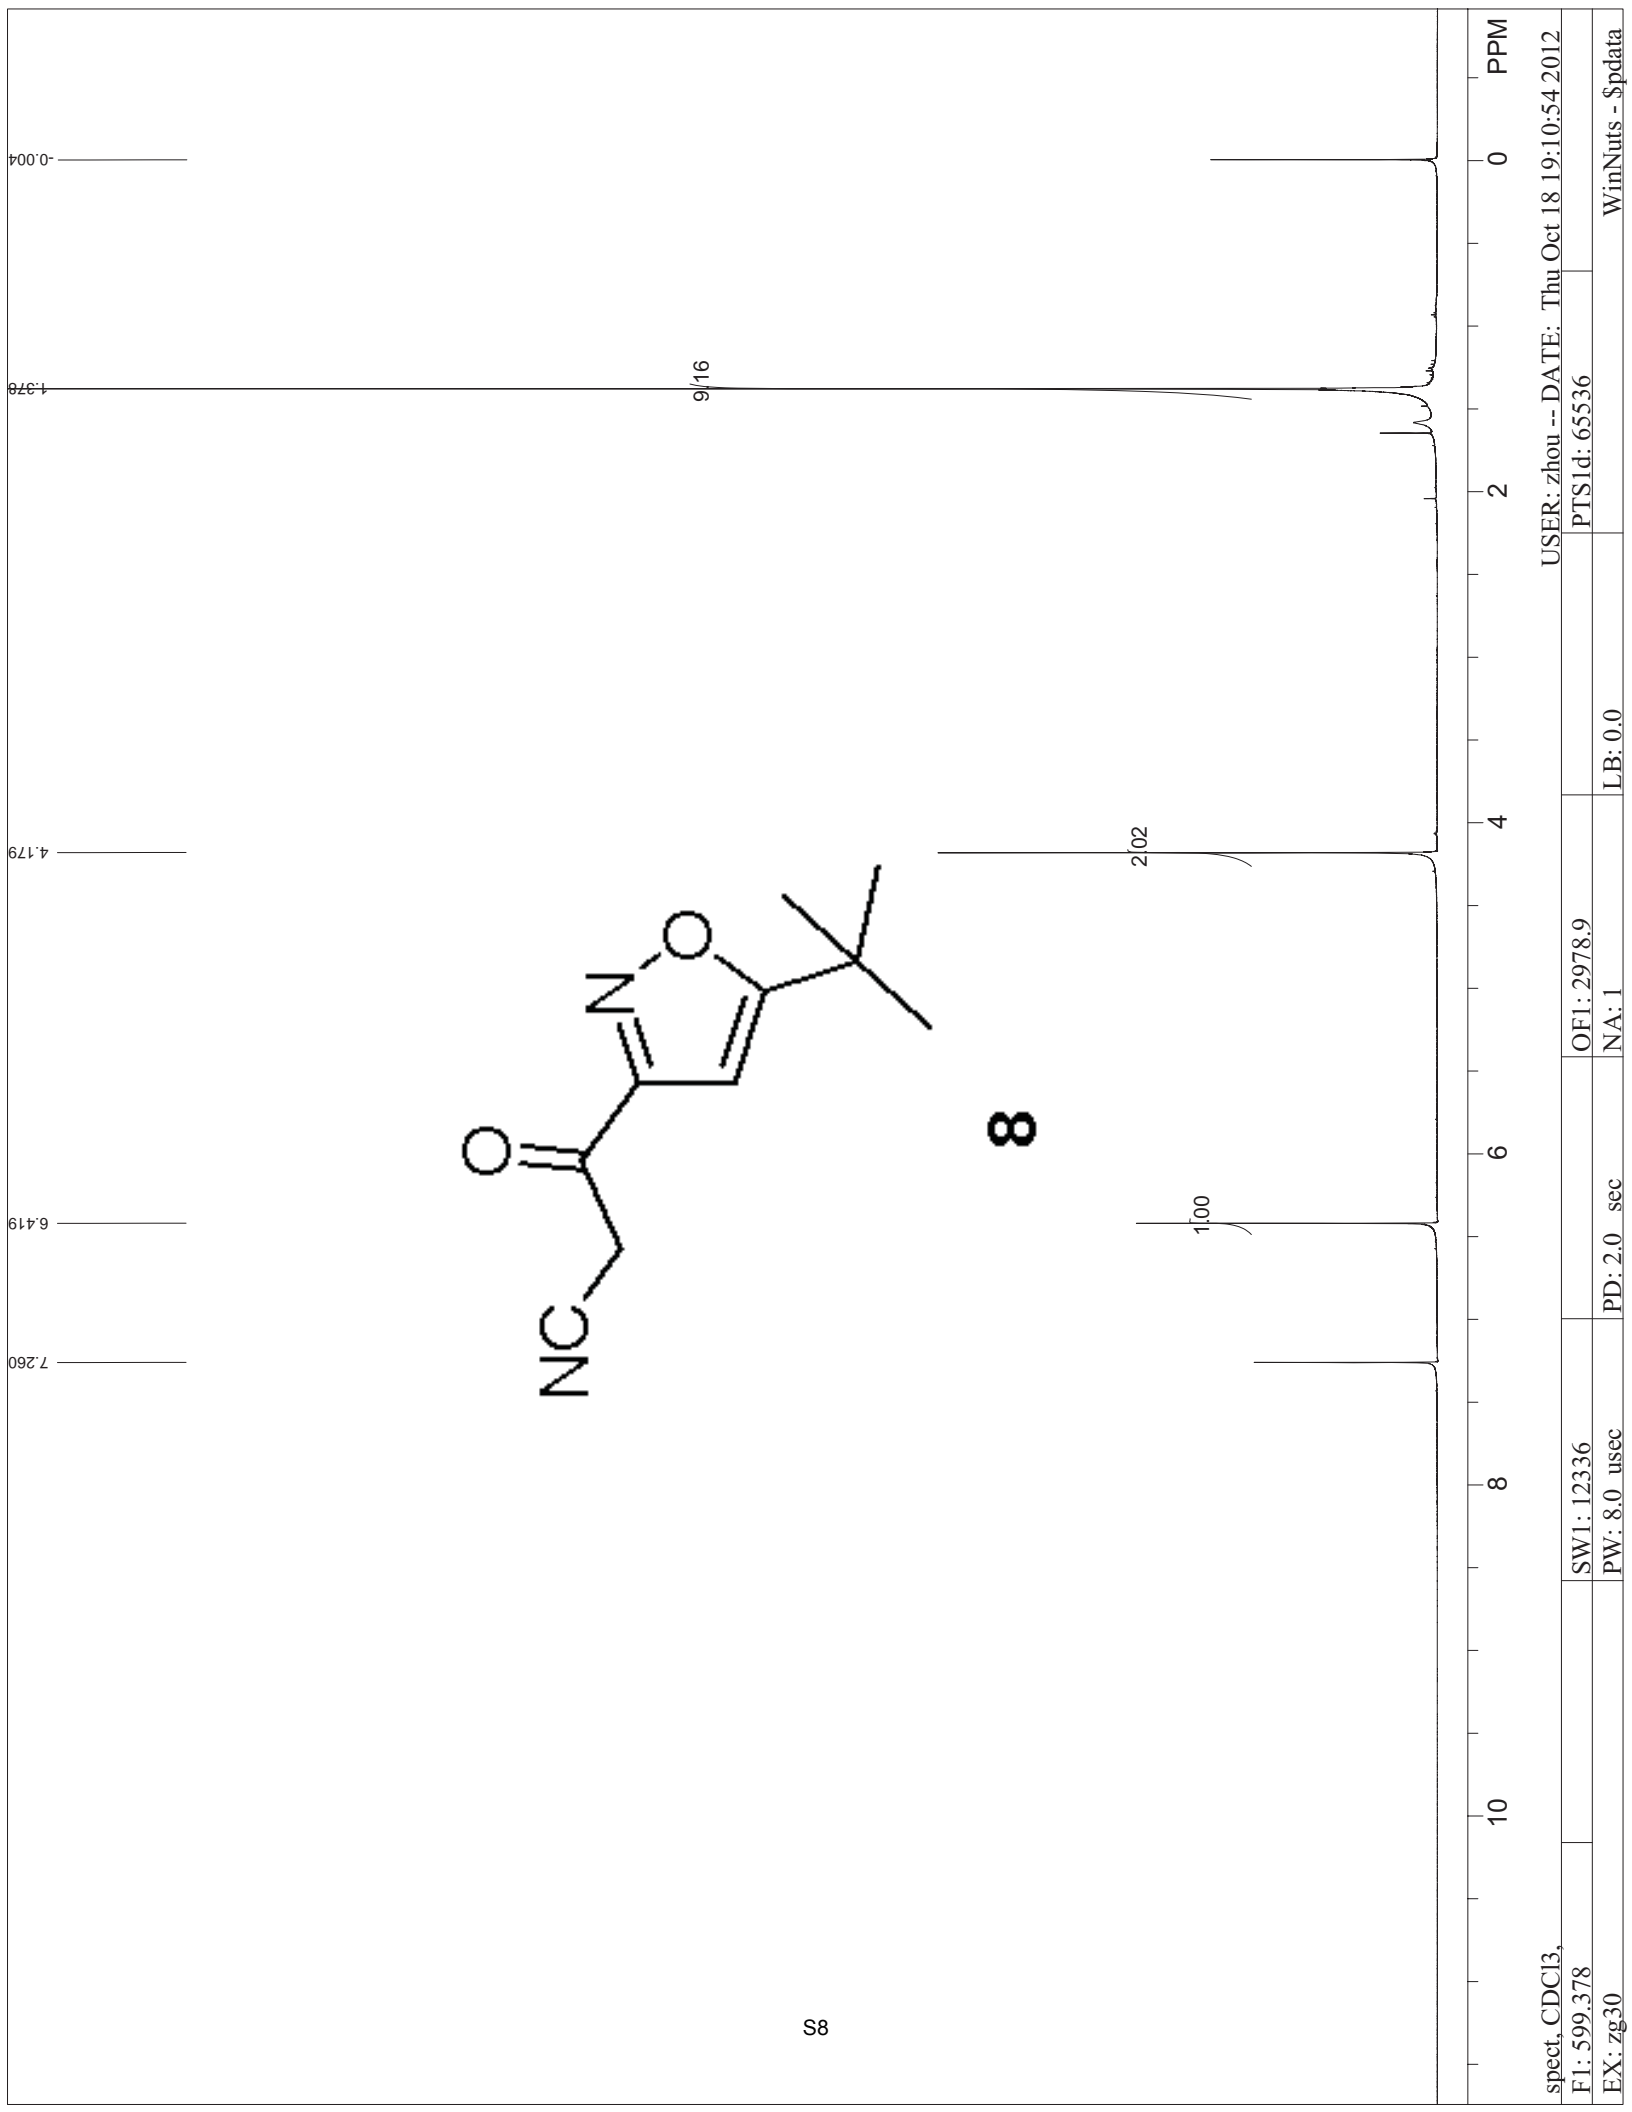



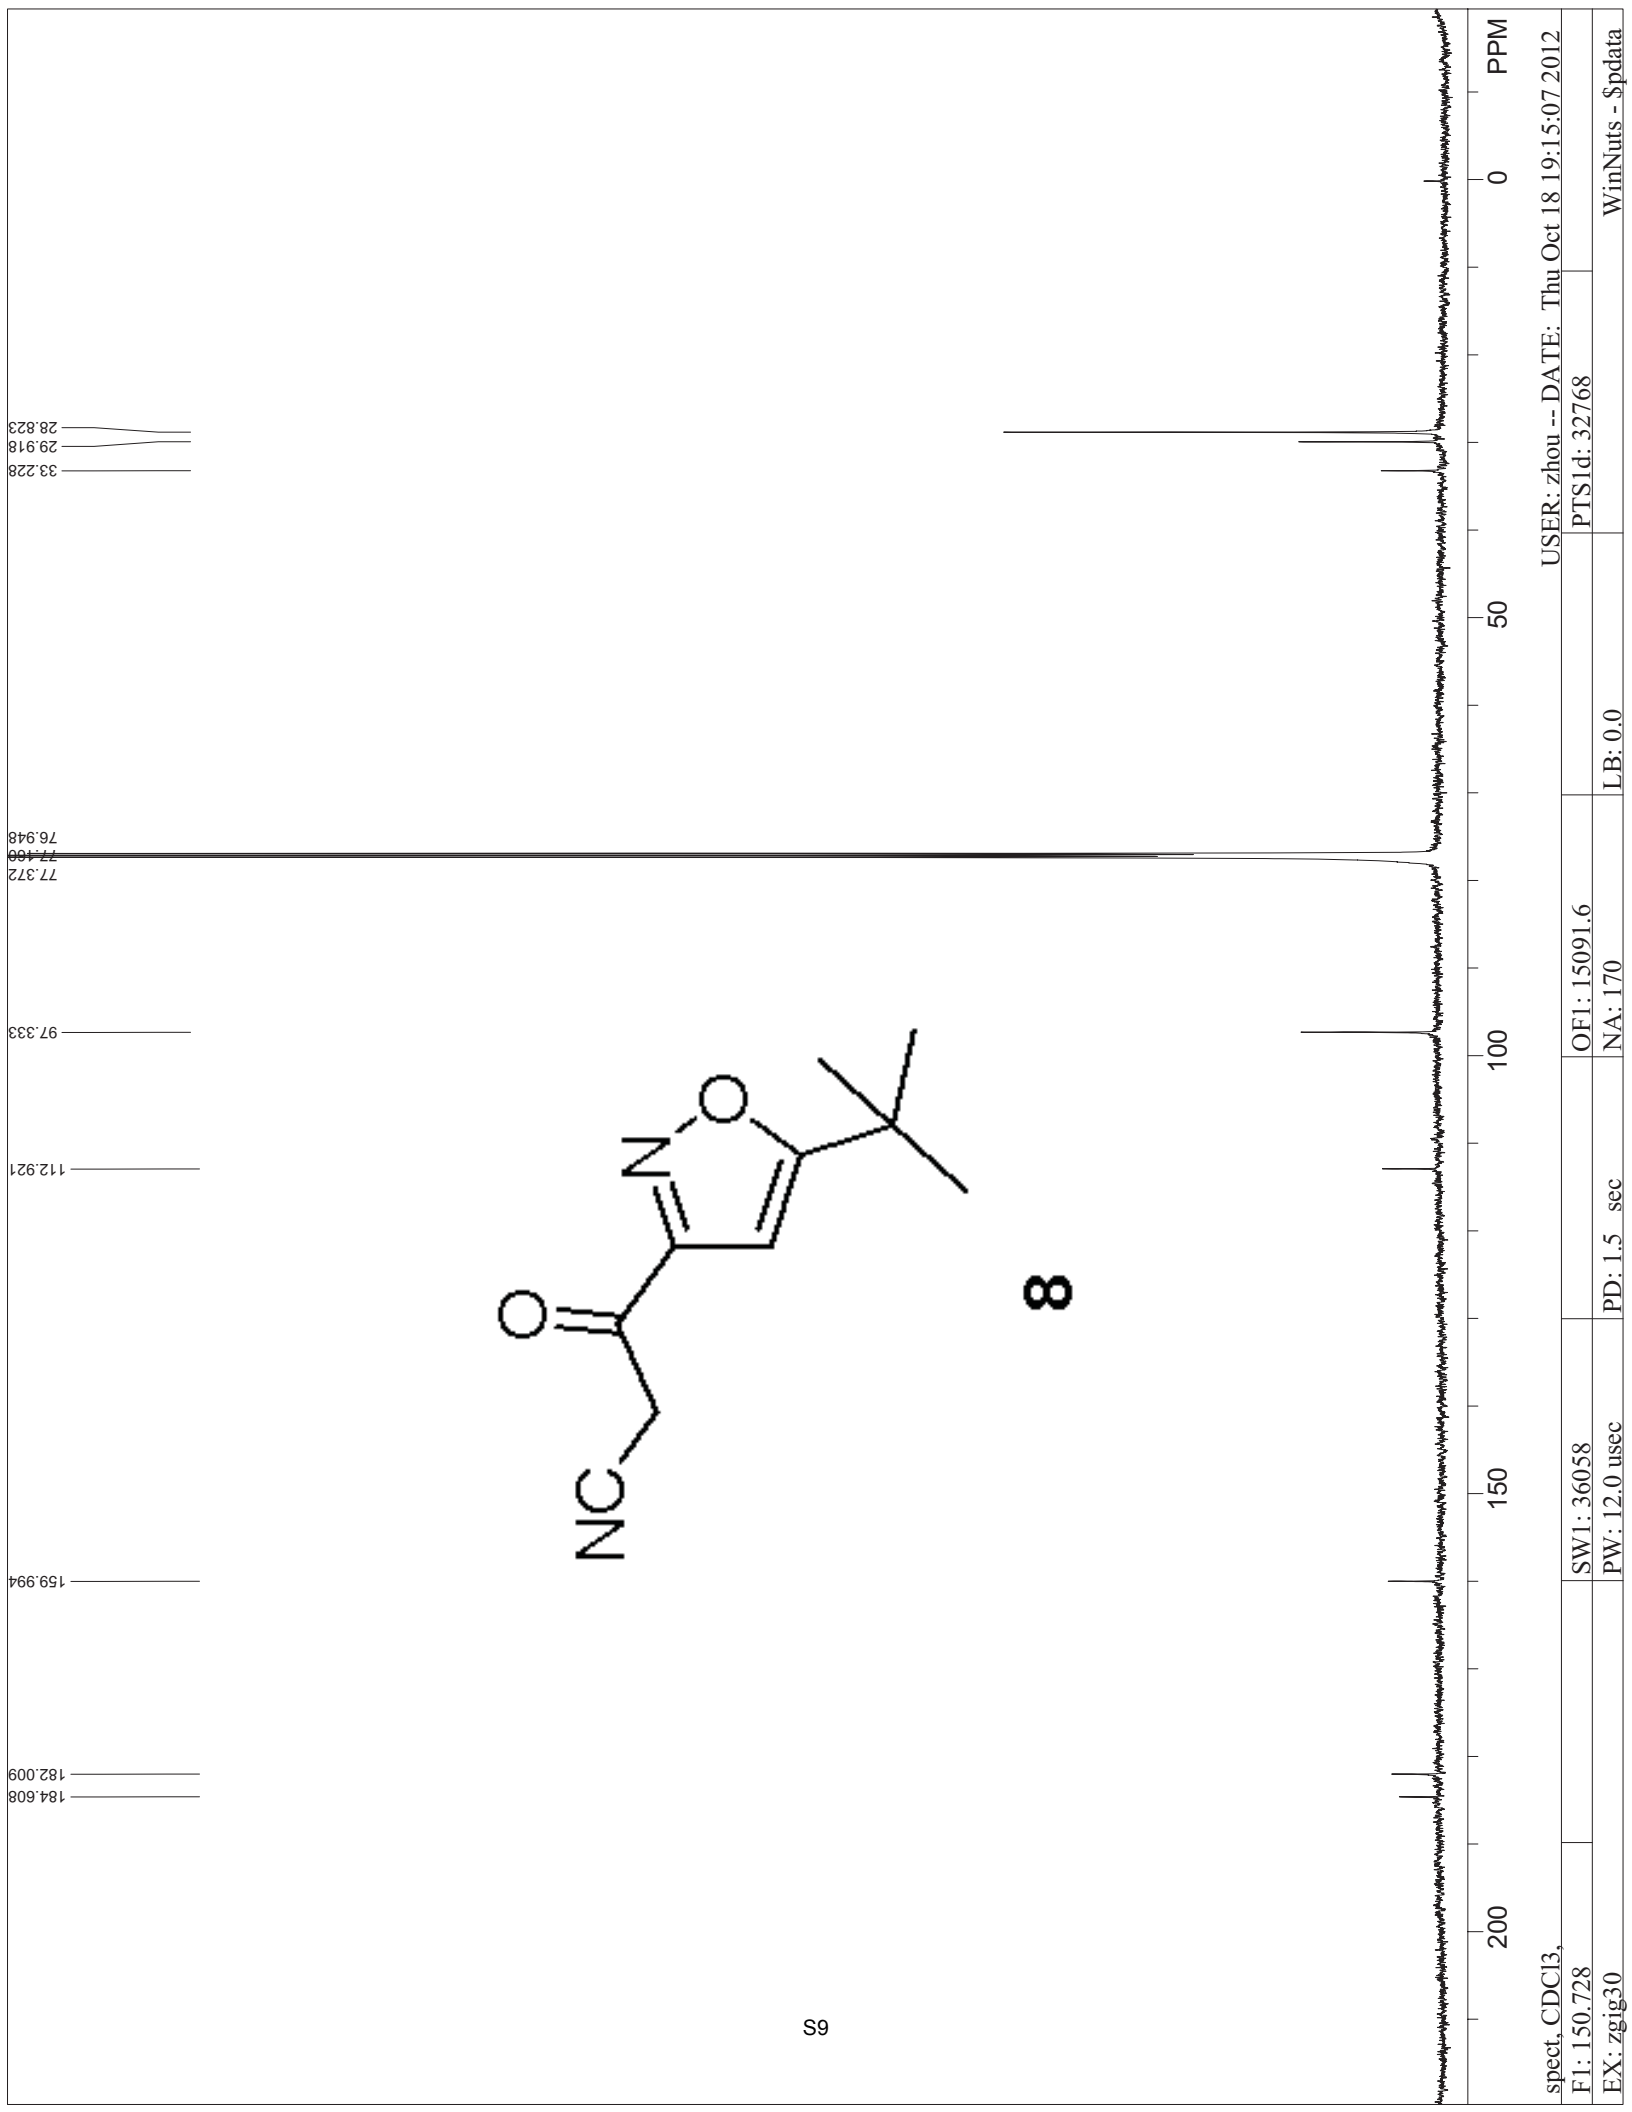

spect, CDCI3, USER: zhou -- DATE: Thu Oct 18 19:15:07 2012  
 F1: 150.728 OF1: 15091.6 PTS1d: 32768  
 EX: zgig30 SW1: 36058 NA: 170 LB: 0.0 WinNuts - \$pdata  
 PD: 1.5 sec

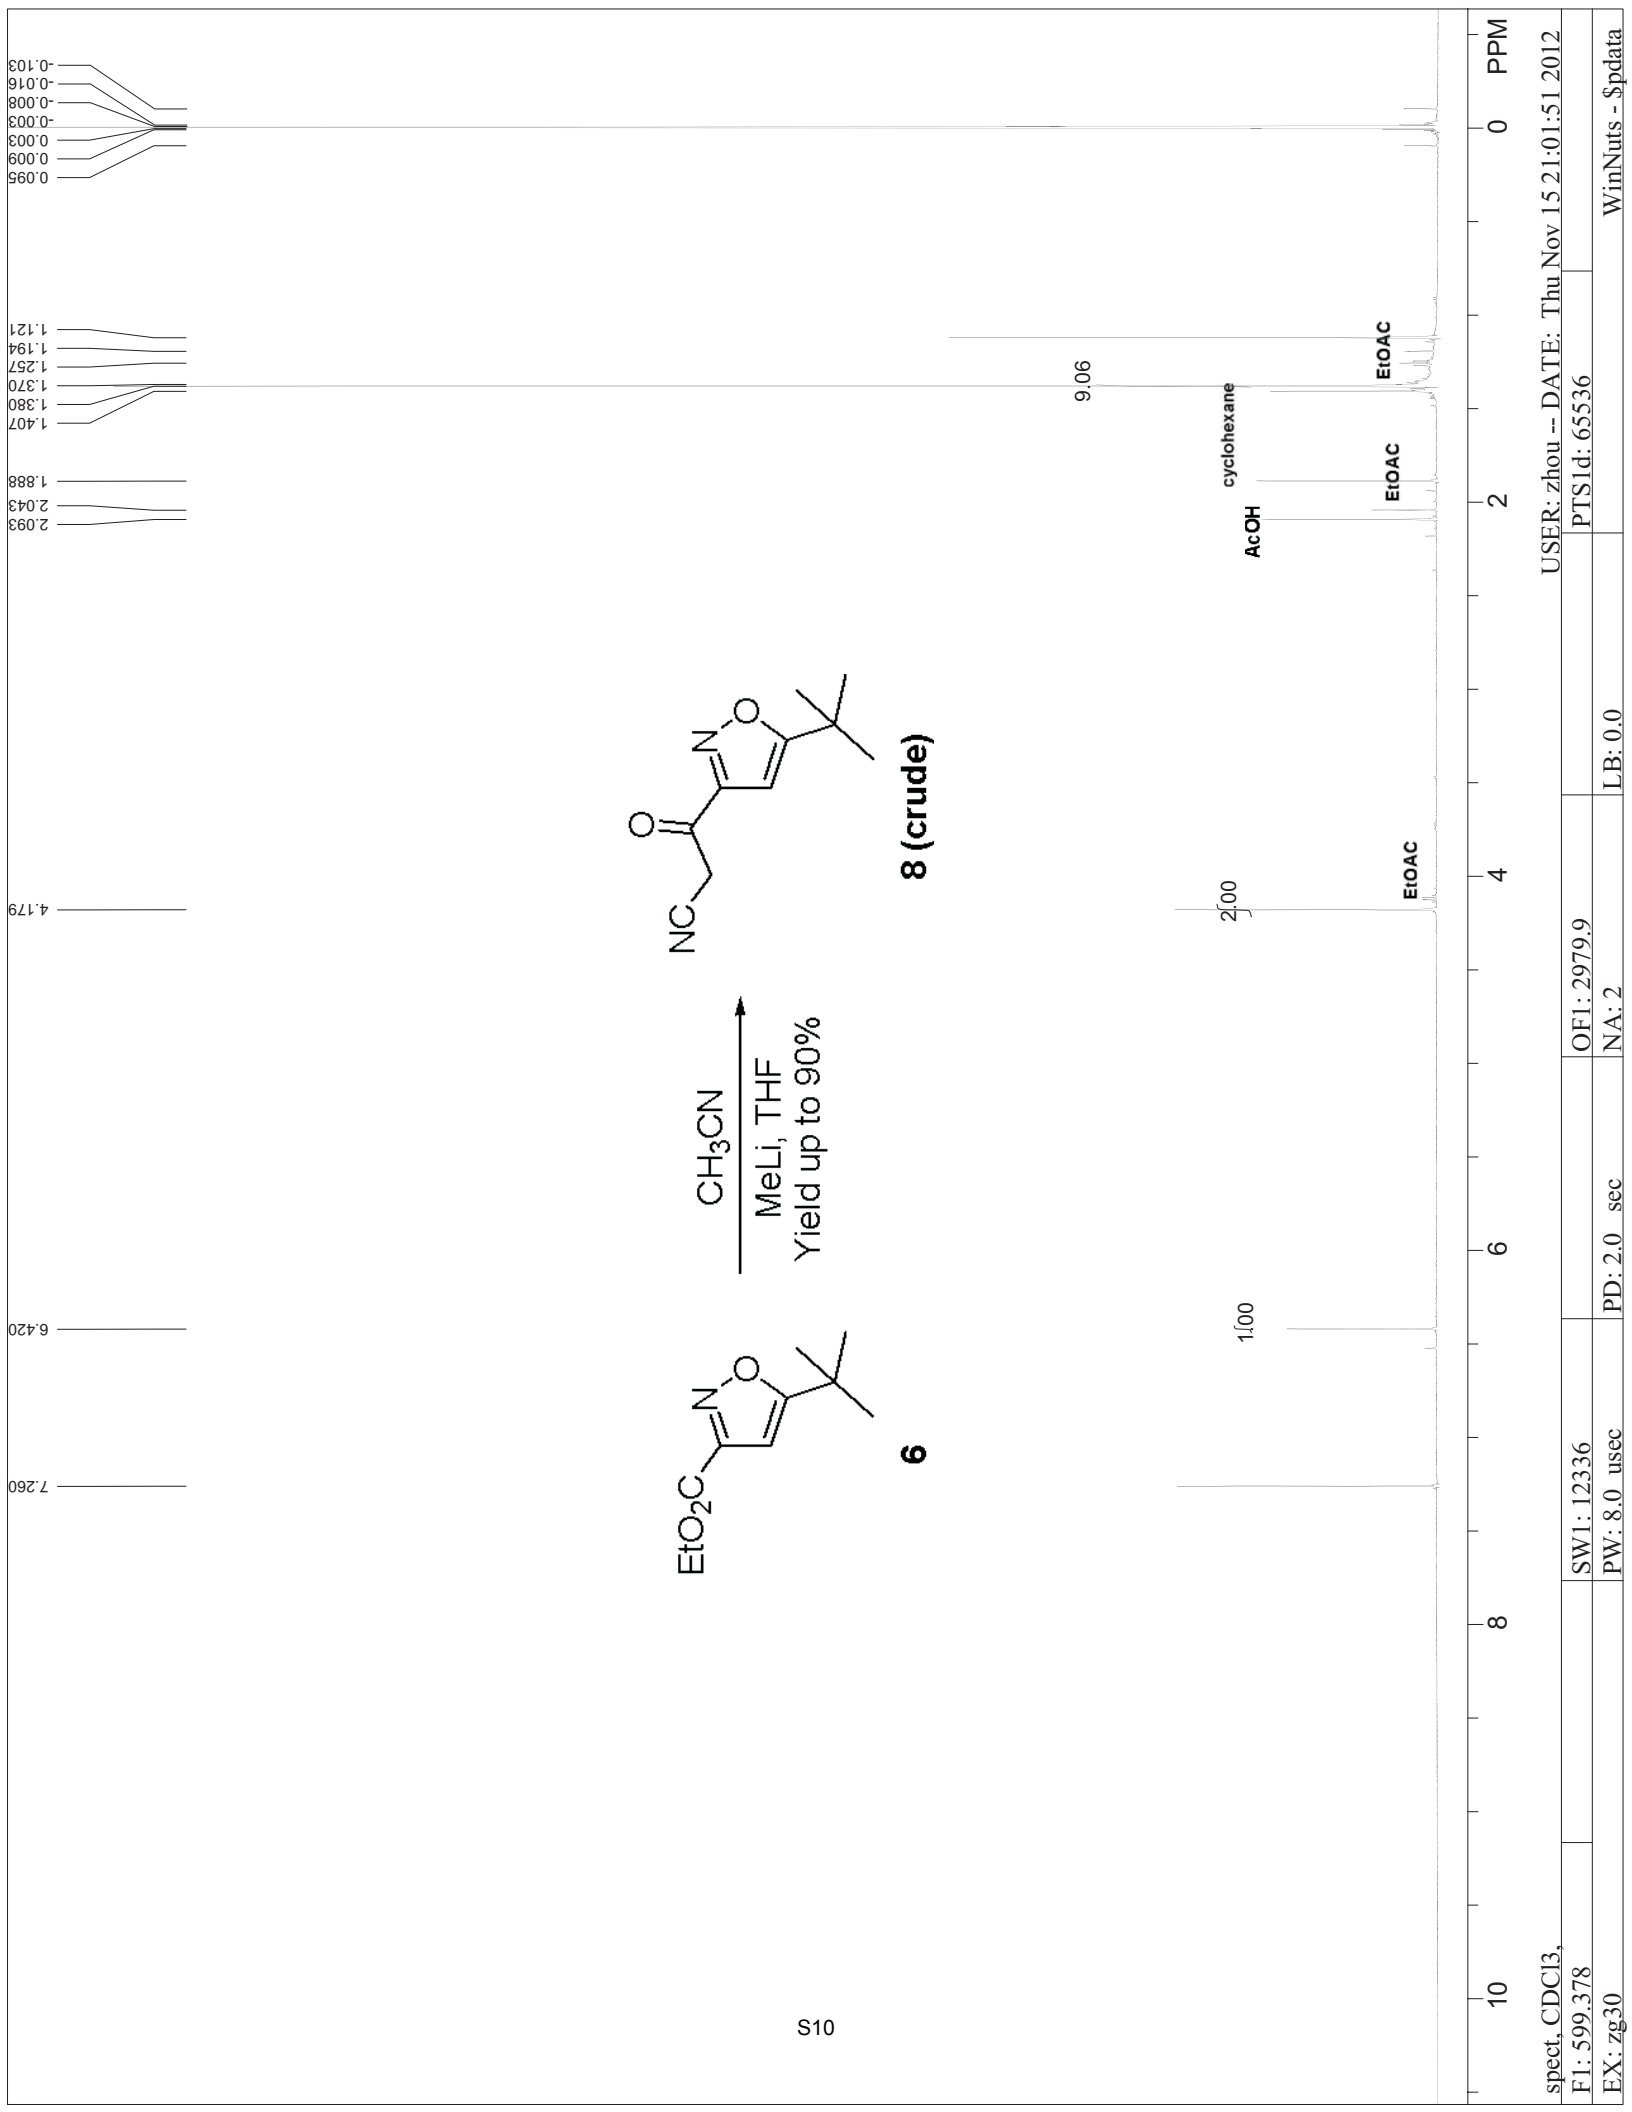

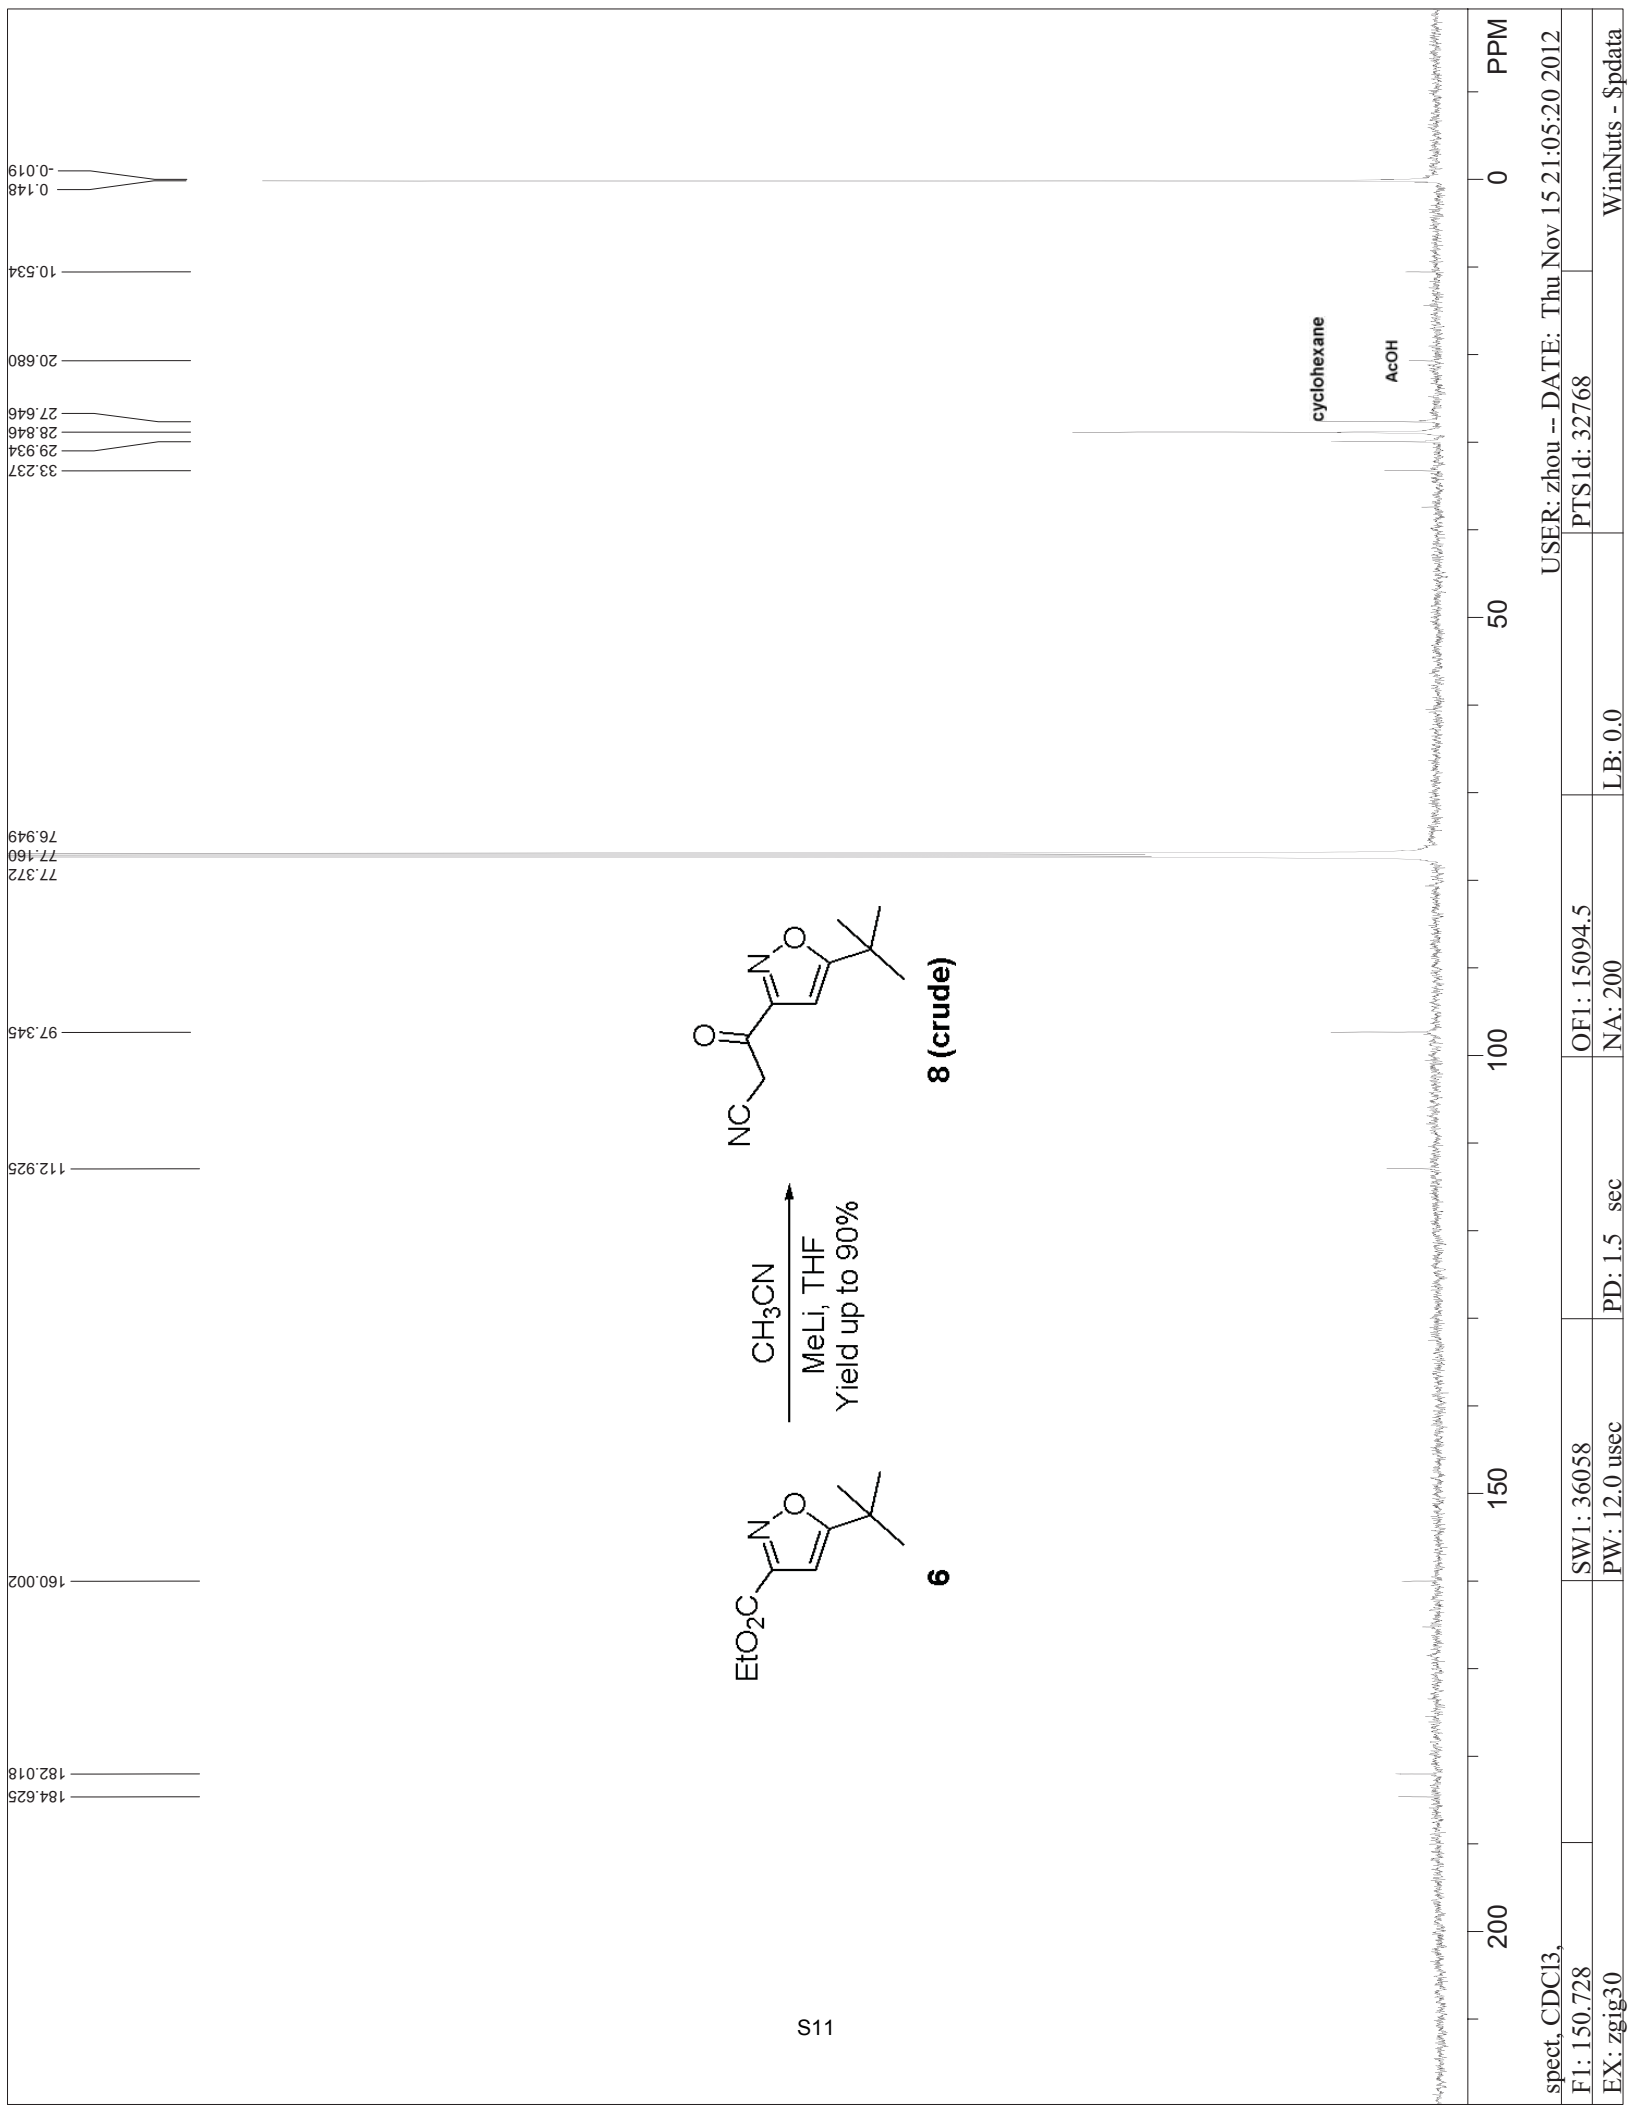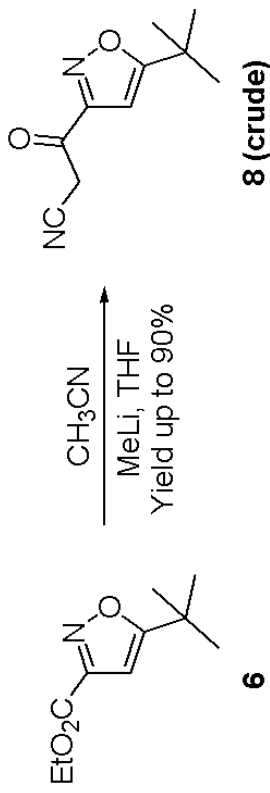

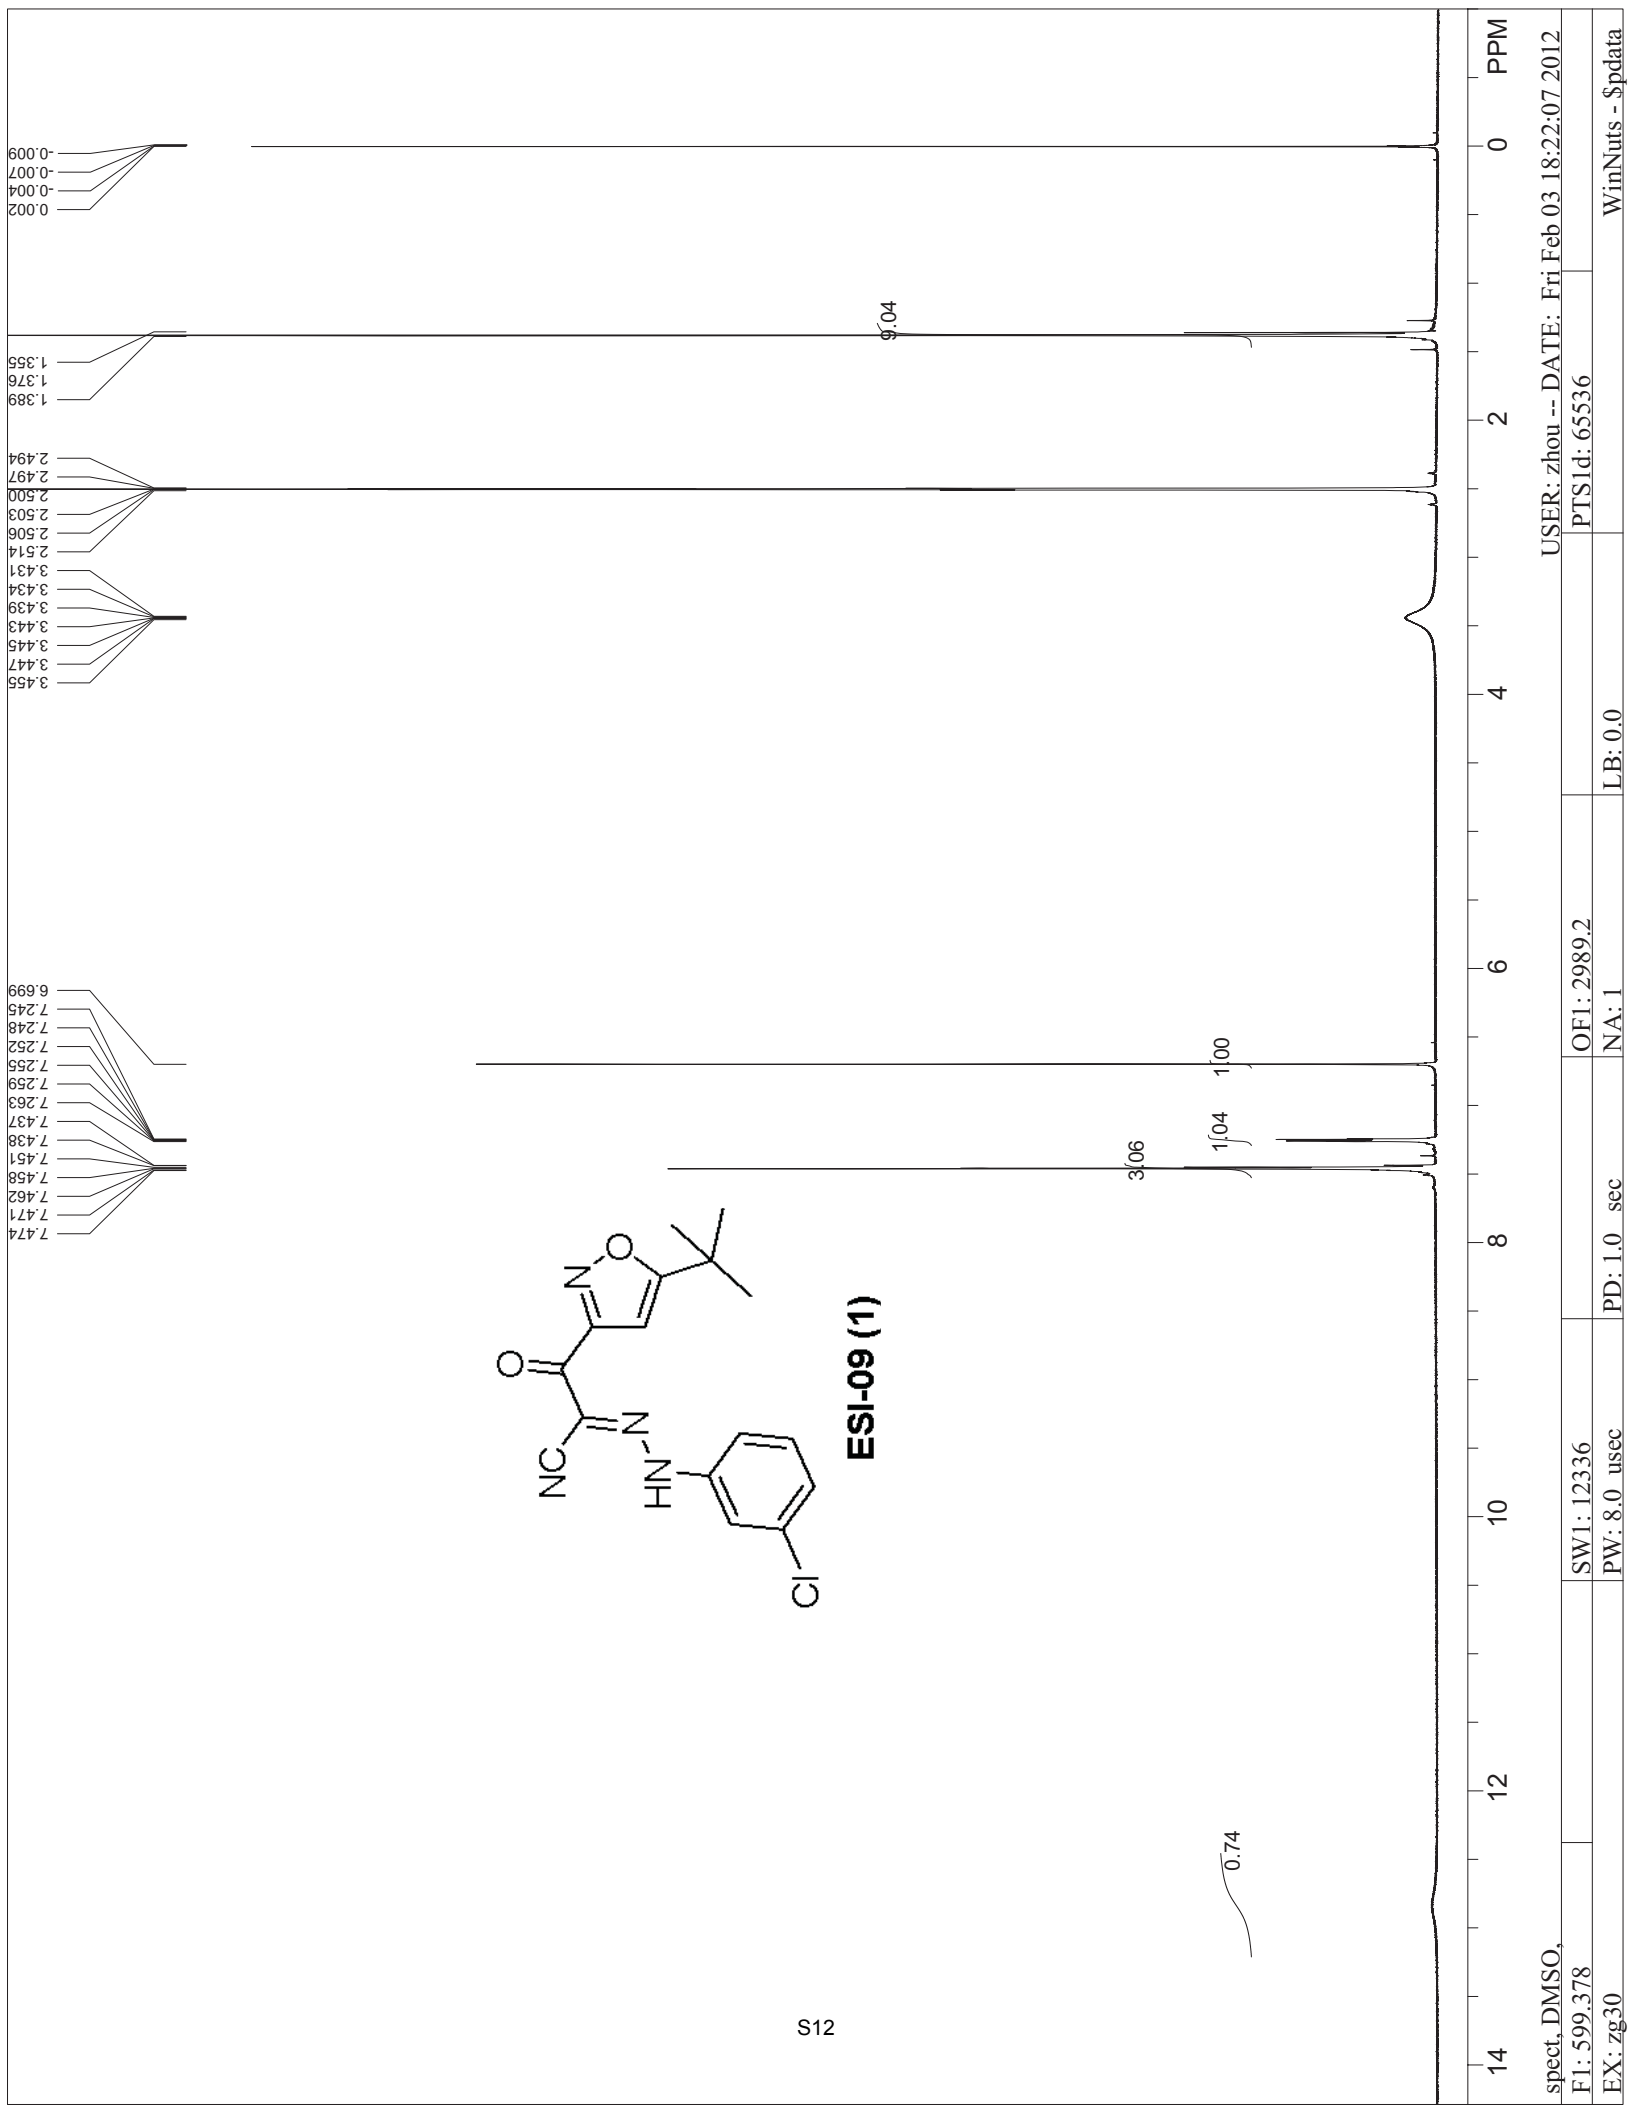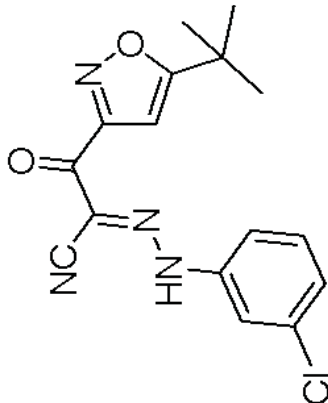

ESI-09 (1)

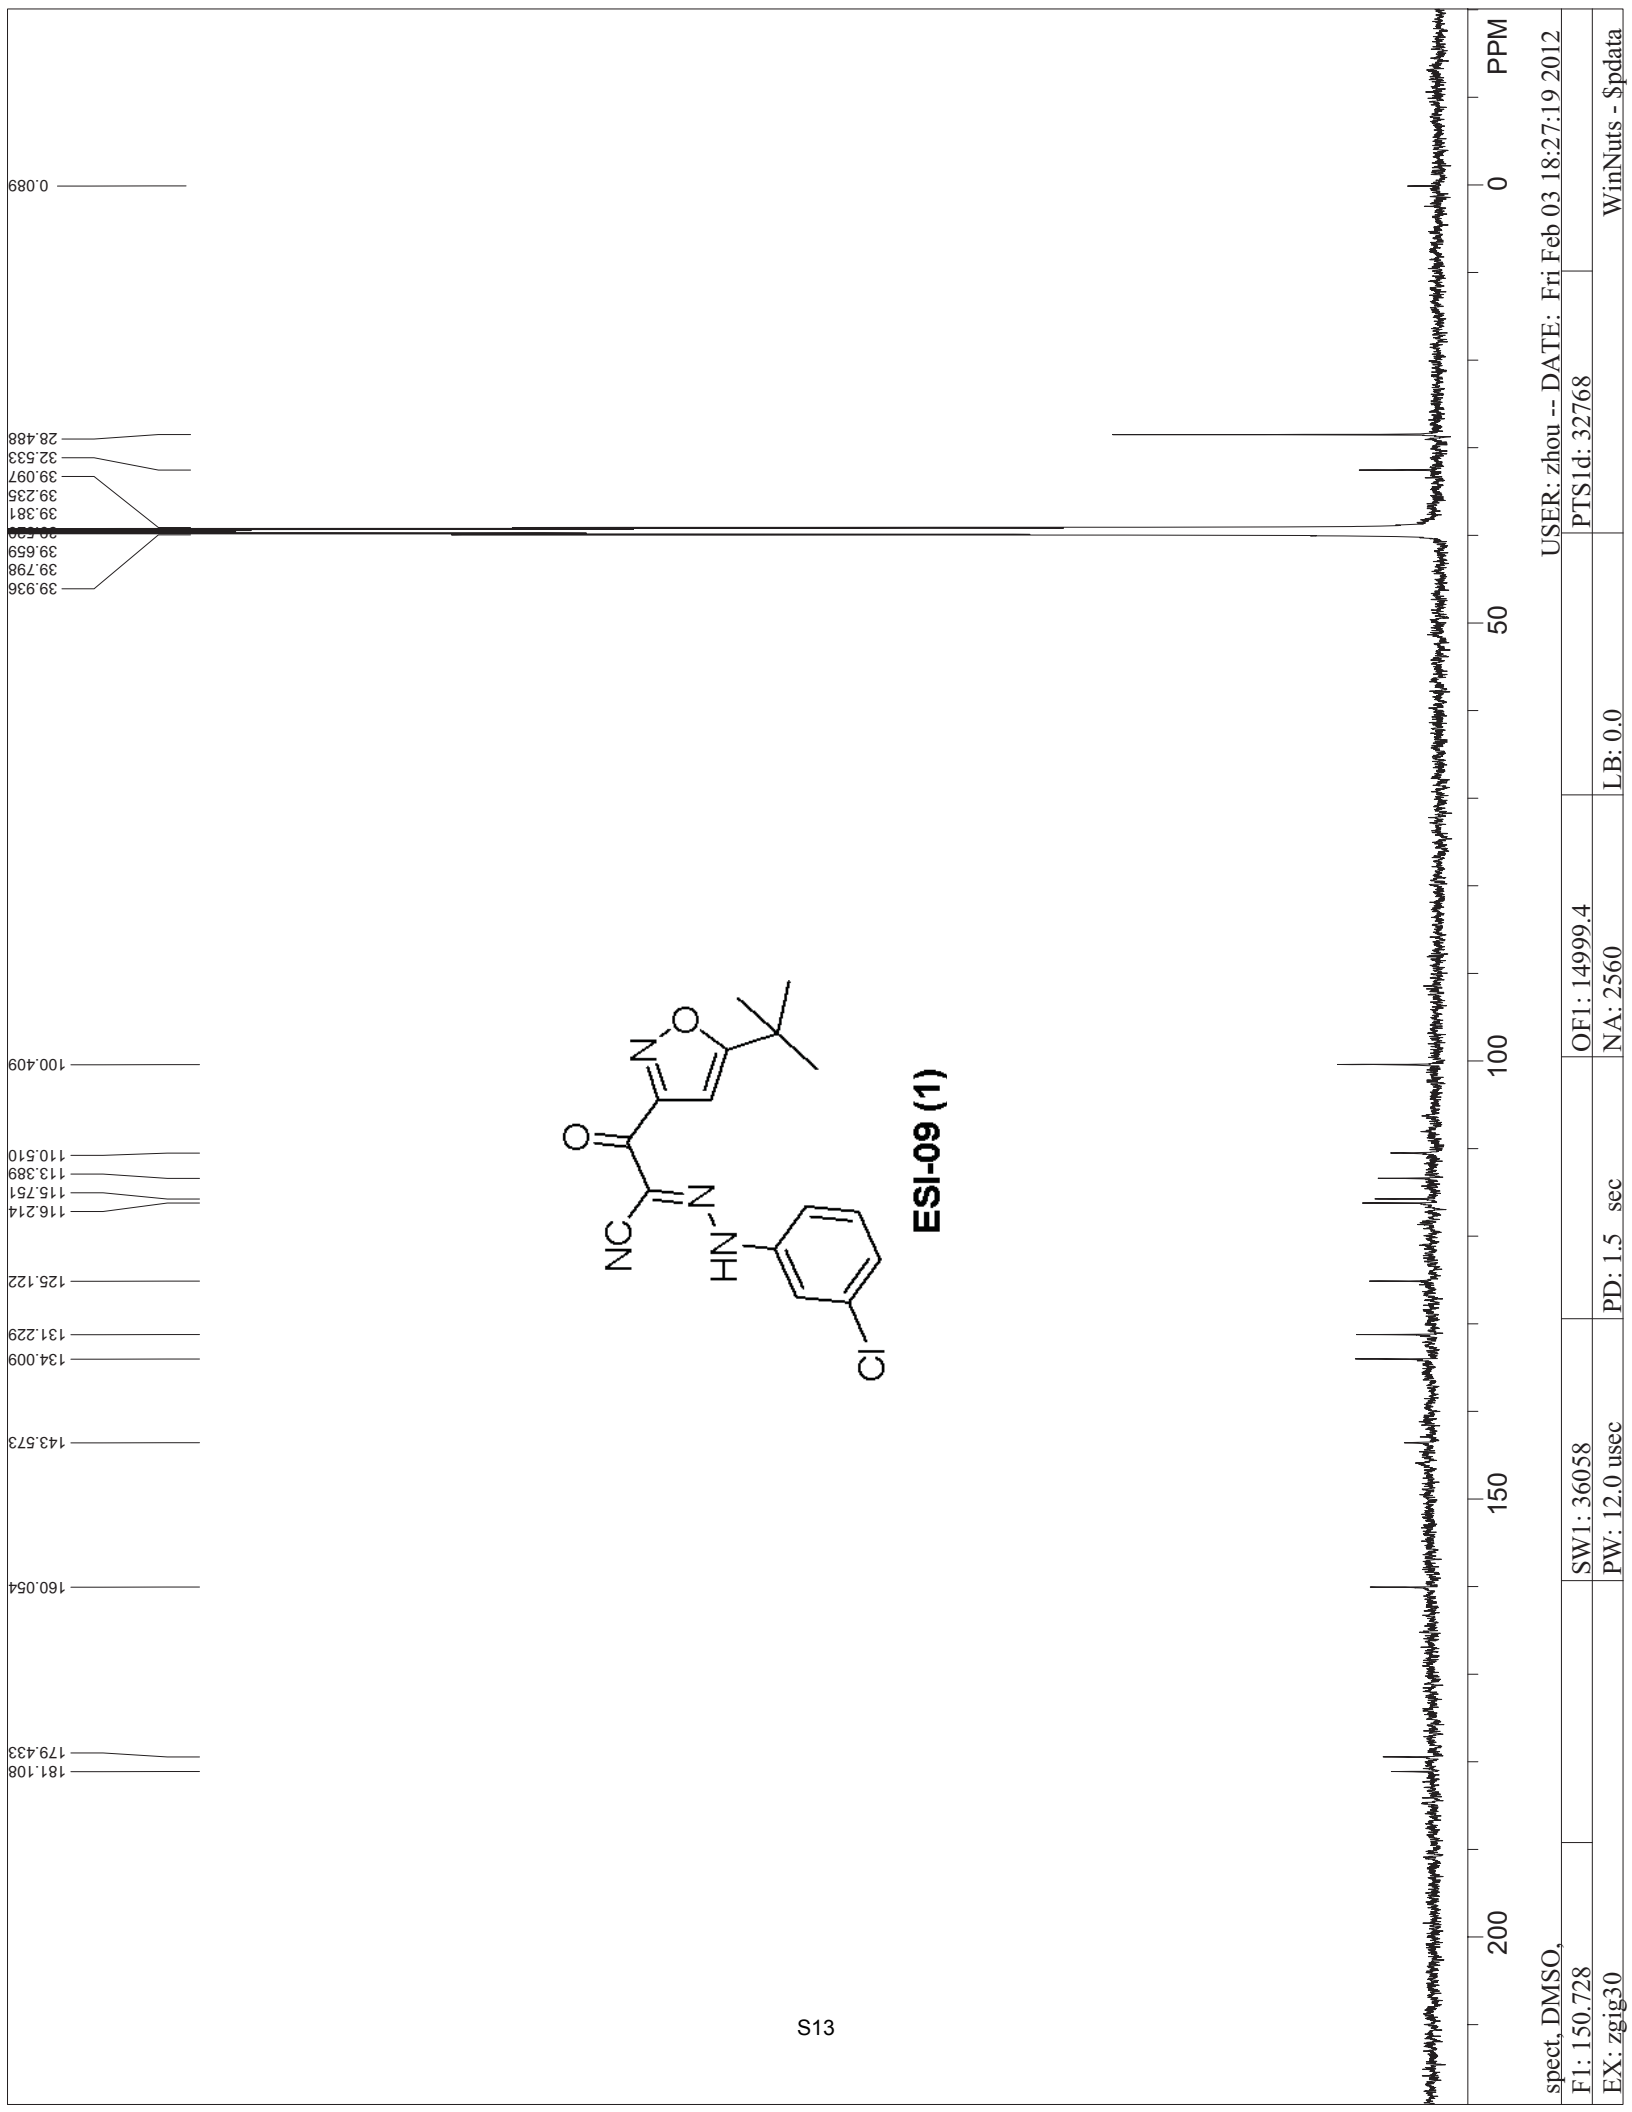

0.089

28.488  
32.533  
39.097  
39.235  
39.381  
39.539  
39.659  
39.798  
39.936

100.409

110.510  
113.389  
115.751  
116.214

125.122

131.229

134.009

143.573

160.054

179.433  
181.108

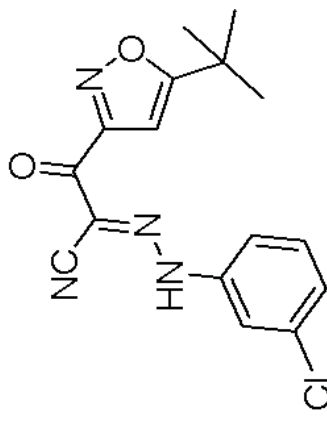

spect, DMSO, USER: zhou -- DATE: Fri Feb 03 18:27:19 2012

F1: 150.728 PTSId: 32768

EX: zgig30 LB: 0.0

OF1: 14999.4

NA: 2560

SW1: 36058

PW: 12.0 usec

PD: 1.5 sec

WinNuts - \$pdata
